# Supplementary material for: Algorithms for the automated correction of vertical drift in eye-tracking data
Source: PubMed Central journal article supplement (PMC8863743; doi:10.3758/s13428-021-01554-0), 2021-06-22

Participant 3, passage 3A (adult)

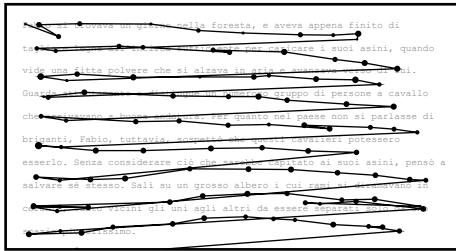

Gold standard manual correction

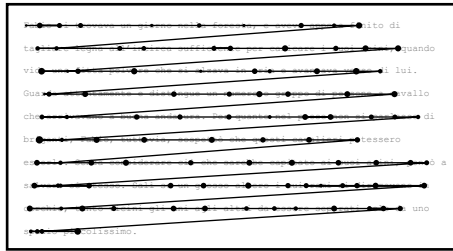

attach

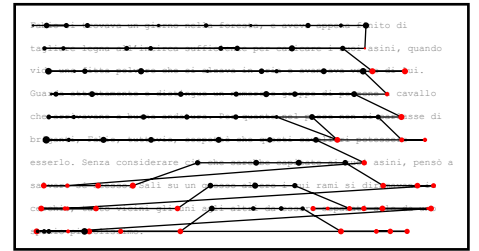

chain

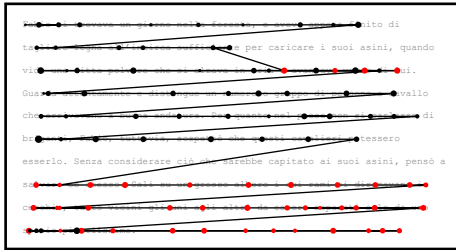

cluster

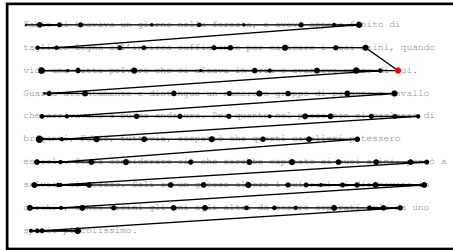

compare

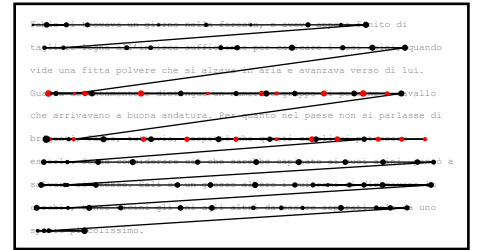

merge

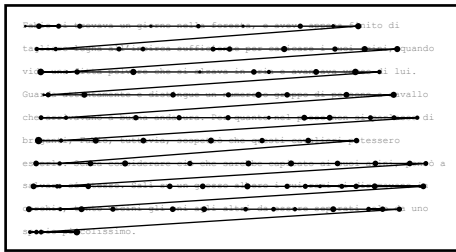

regress

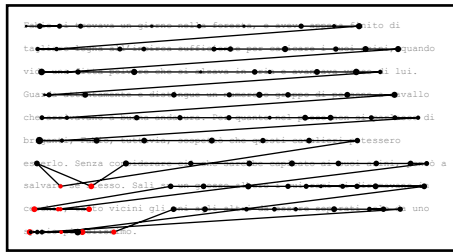

segment

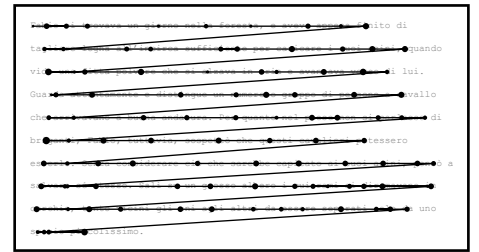

split

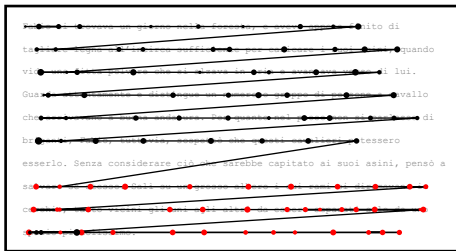

stretch

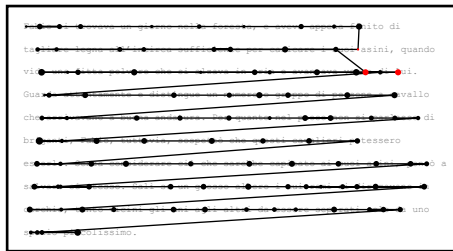

warp

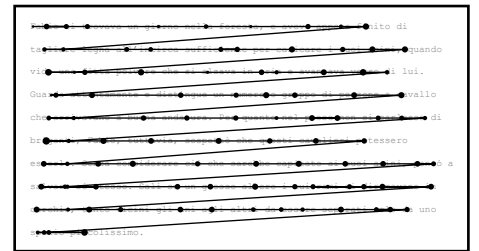

Participant 4, passage 1B (adult)

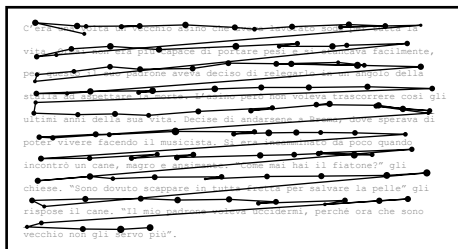

Gold standard manual correction

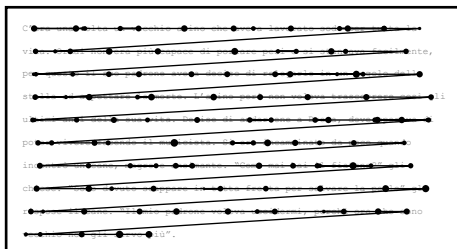

attach

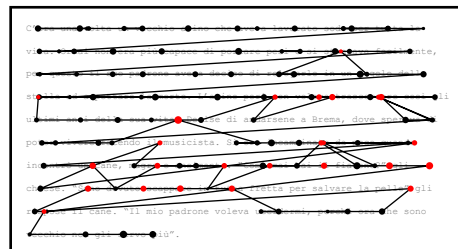

chain

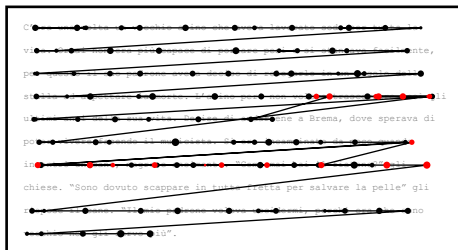

cluster

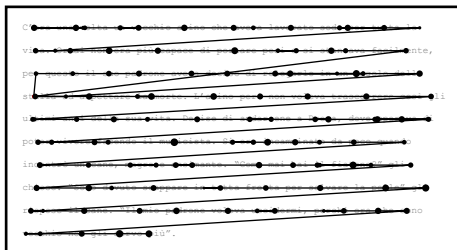

compare

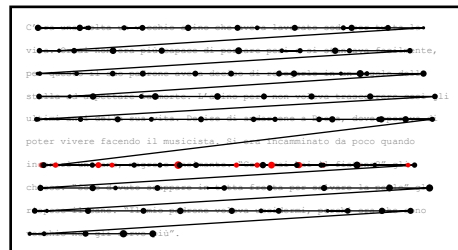

merge

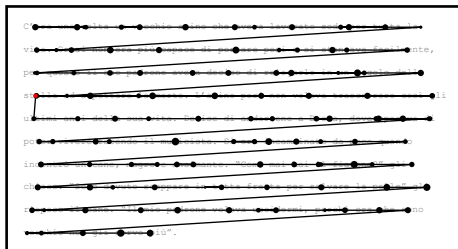

regress

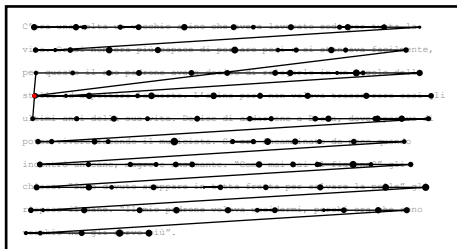

segment

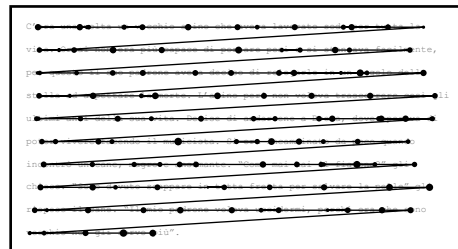

split

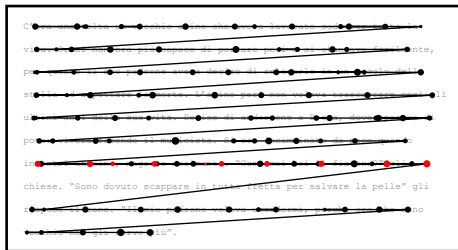

stretch

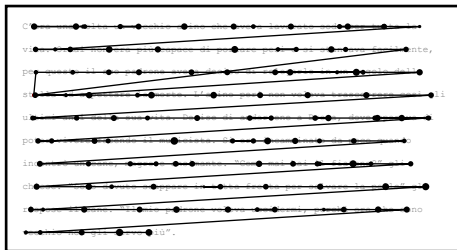

warp

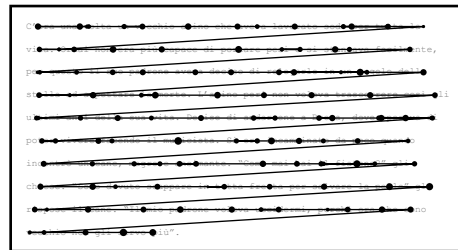

Participant 5, passage 3A (adult)

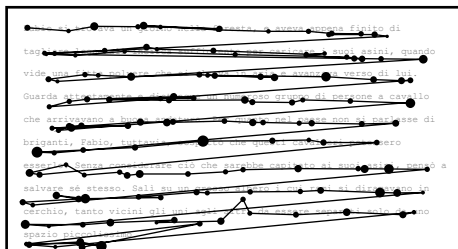

Gold standard manual correction

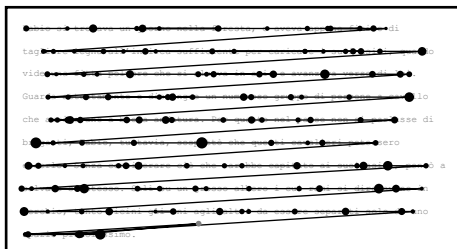

attach

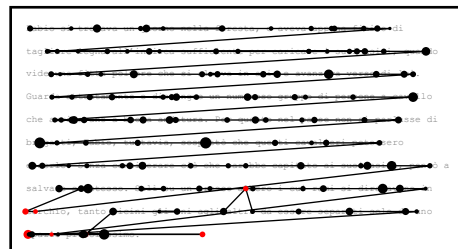

chain

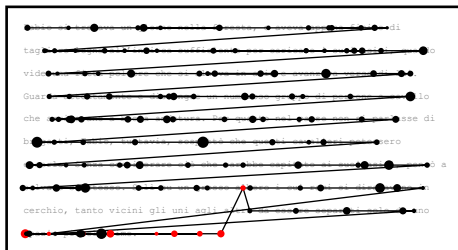

cluster

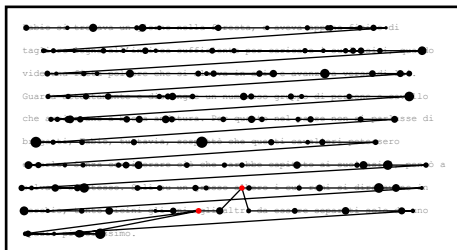

compare

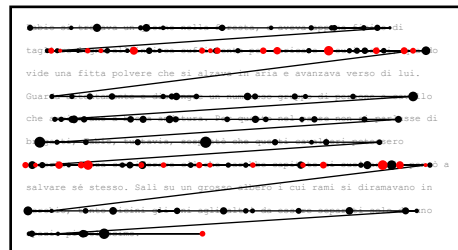

merge

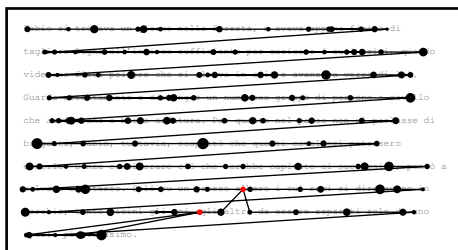

regress

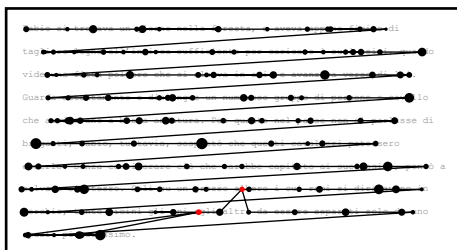

segment

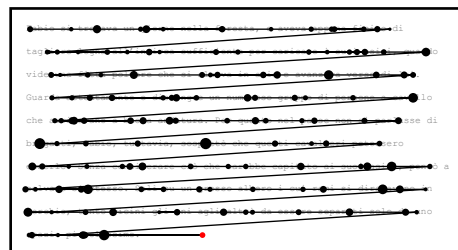

split

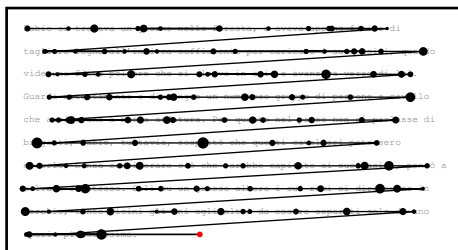

stretch

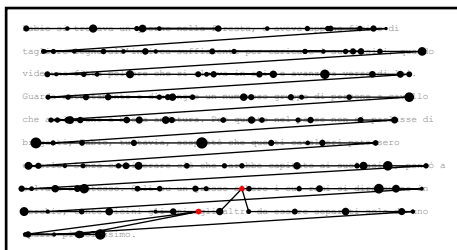

warp

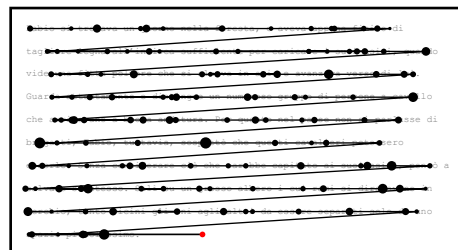

Participant 6, passage 5B (adult)

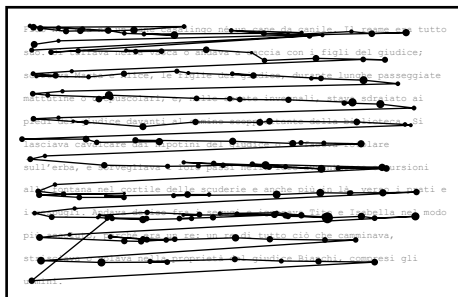

Gold standard manual correction

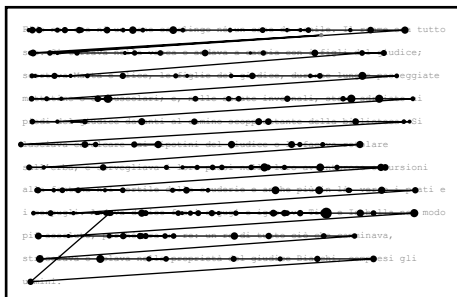

attach

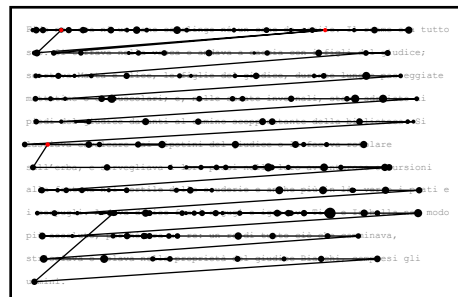

chain

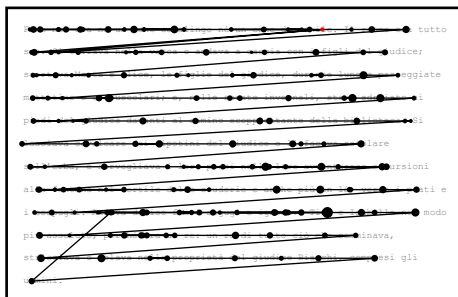

cluster

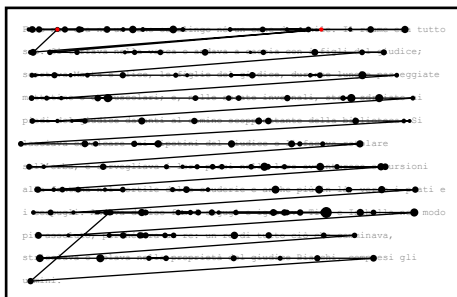

compare

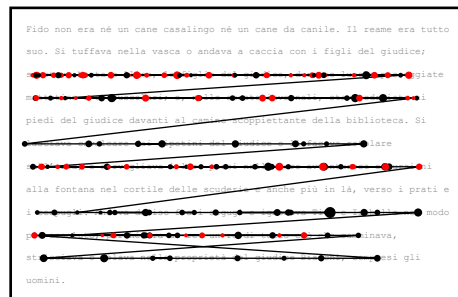

merge

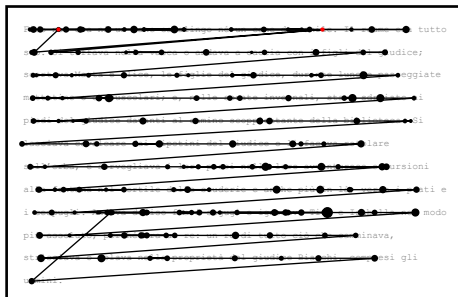

regress

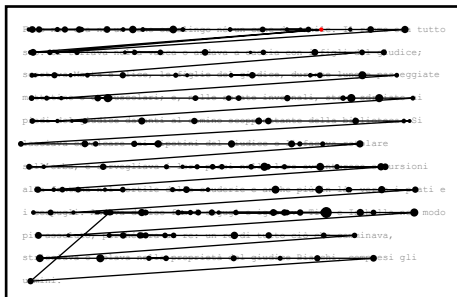

segment

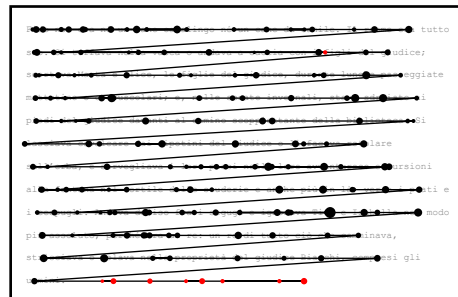

split

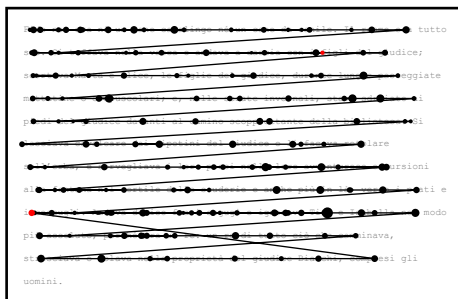

stretch

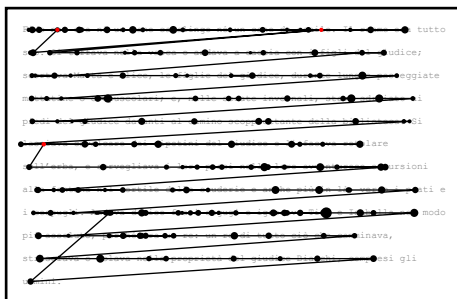

warp

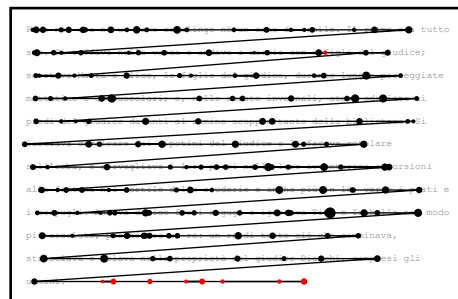



Participant 9, passage 1A (adult)

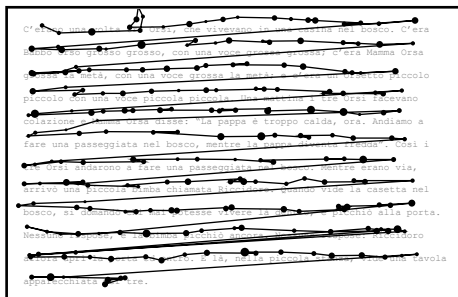

Gold standard manual correction

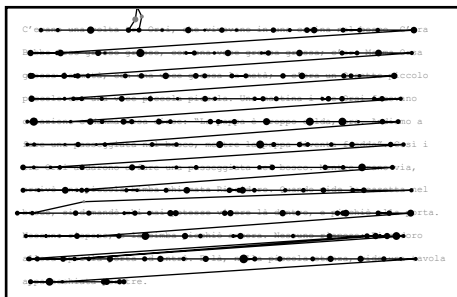

attach

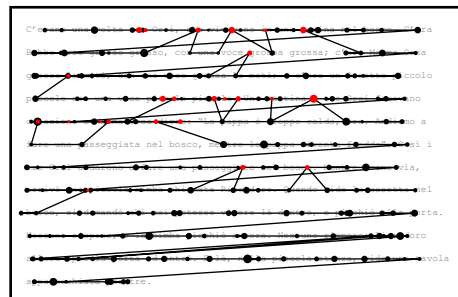

chain

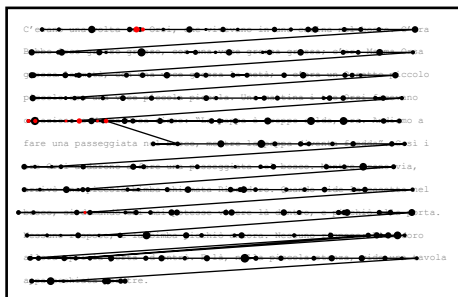

cluster

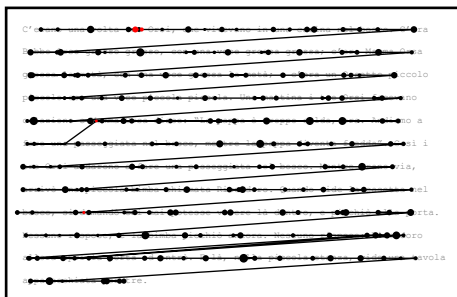

compare

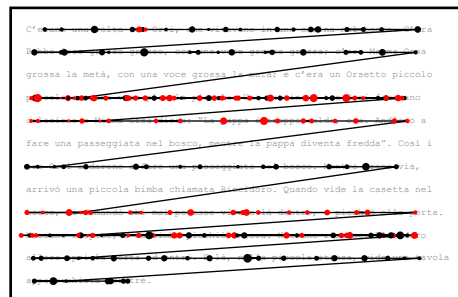

merge

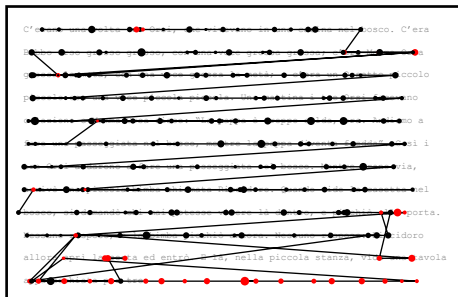

regress

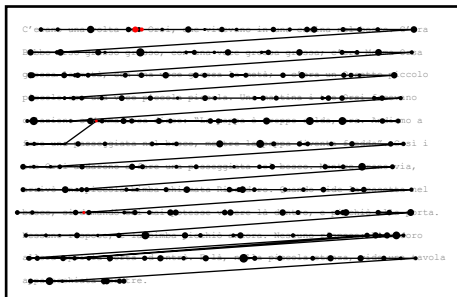

segment

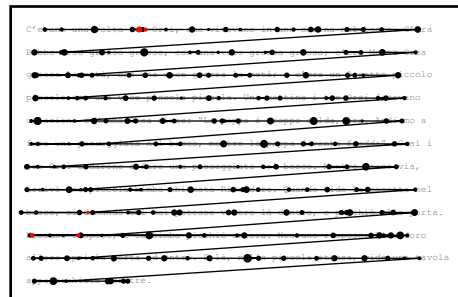

split

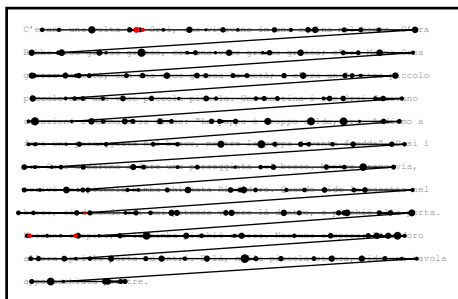

stretch

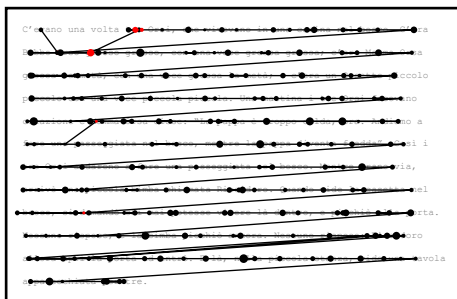

warp

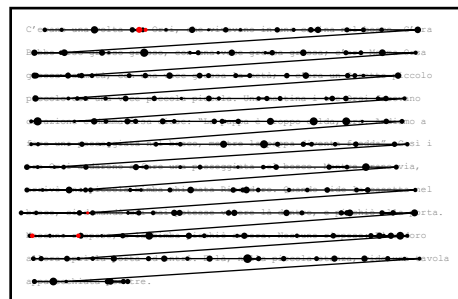

Participant 10, passage 6B (adult)

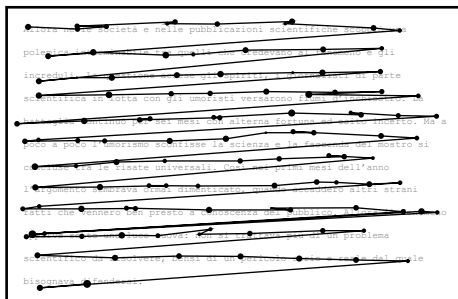

Gold standard manual correction

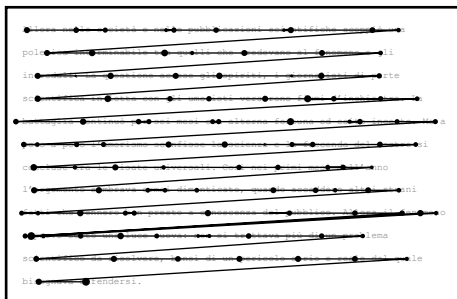

attach

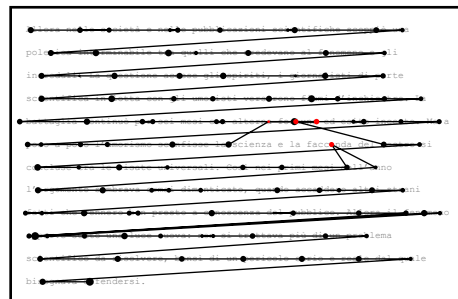

chain

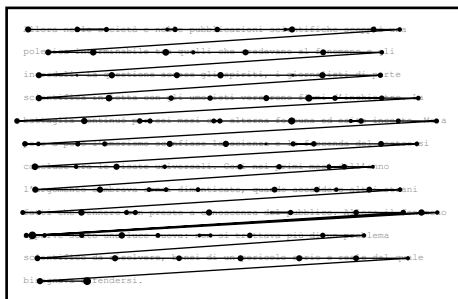

cluster

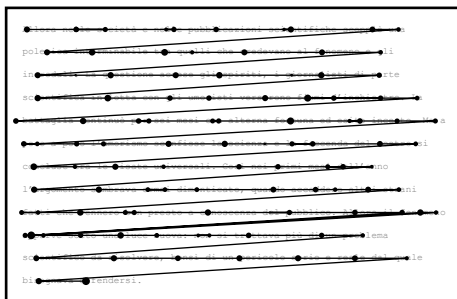

compare

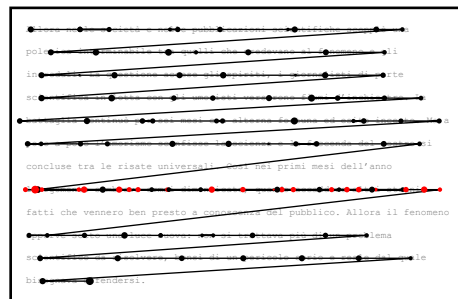

merge

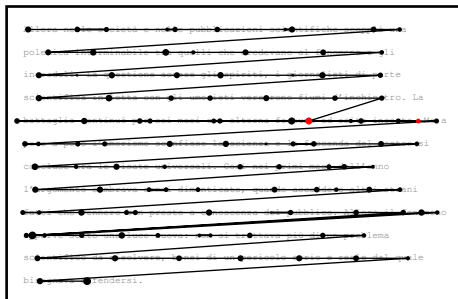

regress

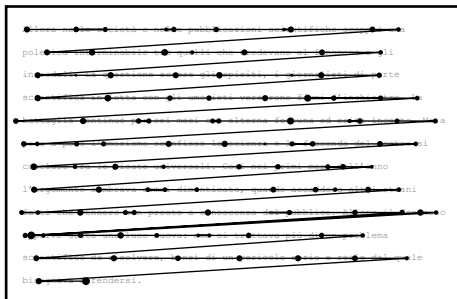

segment

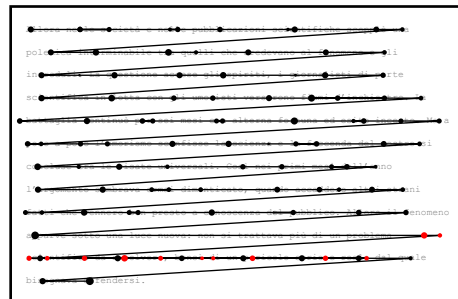

split

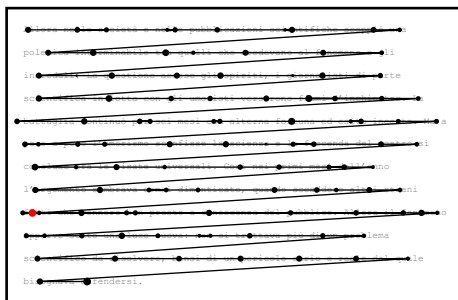

stretch

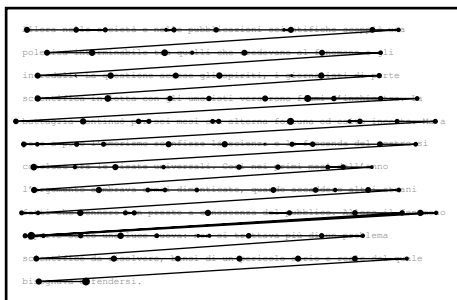

warp

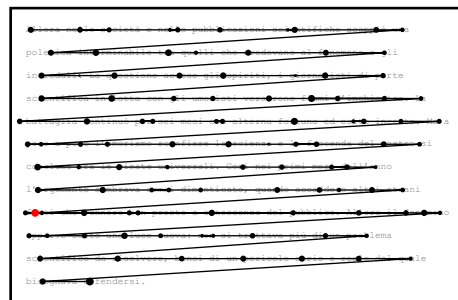



Participant 12, passage 2B (adult)

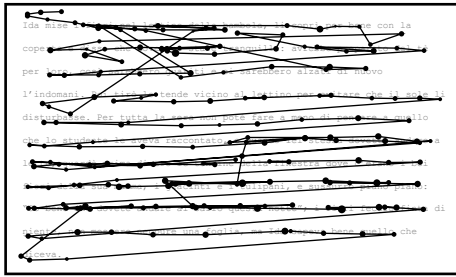

Gold standard manual correction

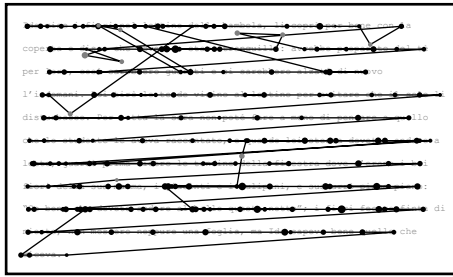

attach

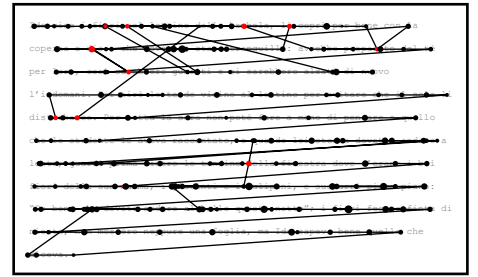

chain

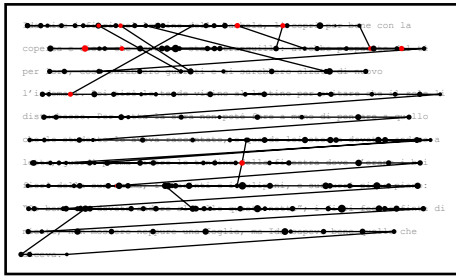

cluster

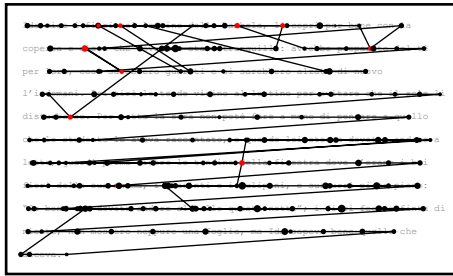

compare

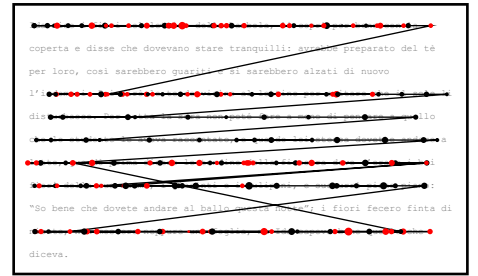

merge

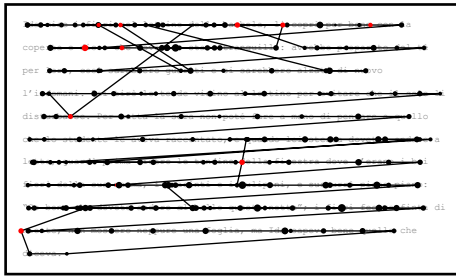

regress

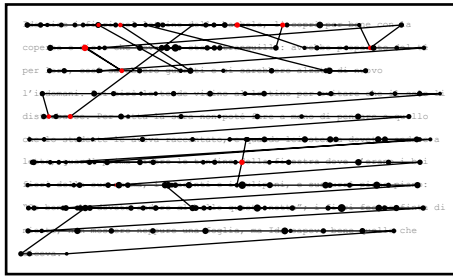

segment

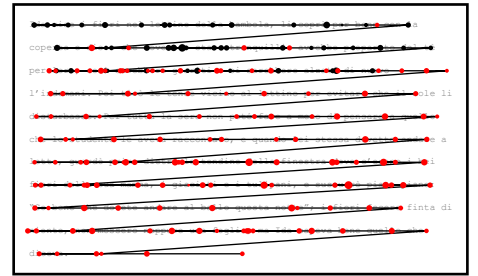

split

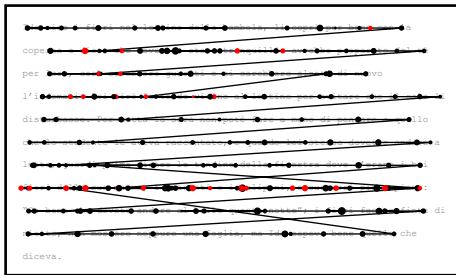

stretch

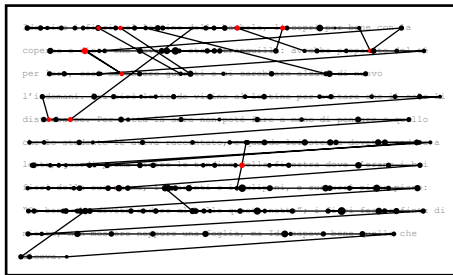

warp

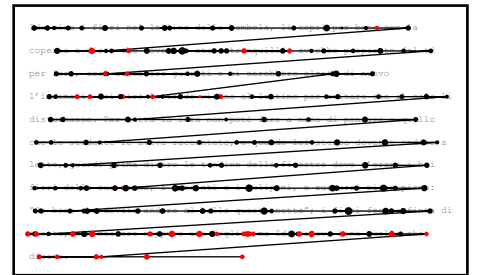

Participant 15, passage 2A (adult)

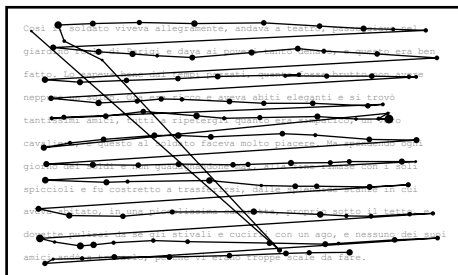

Gold standard manual correction

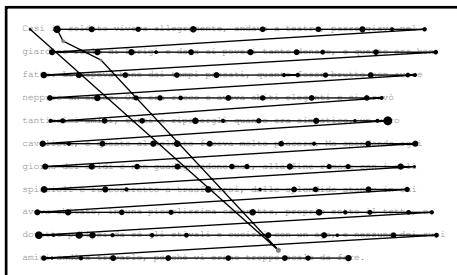

attach

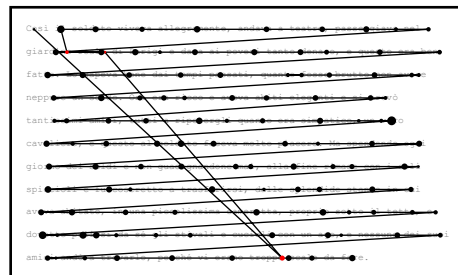

chain

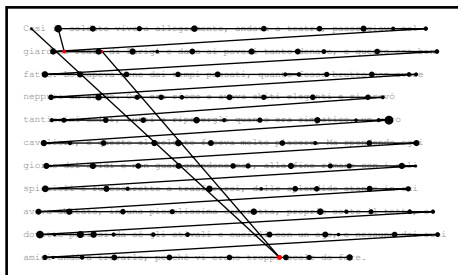

cluster

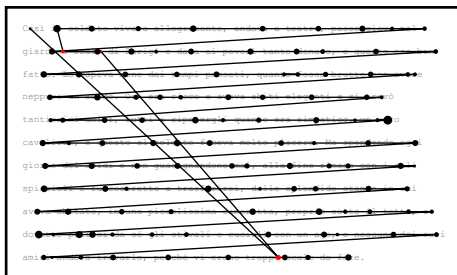

compare

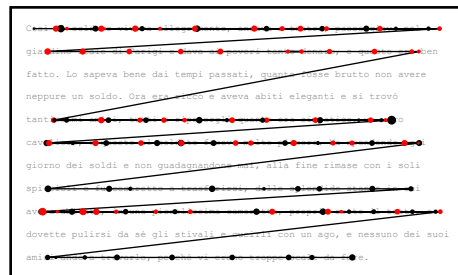

merge

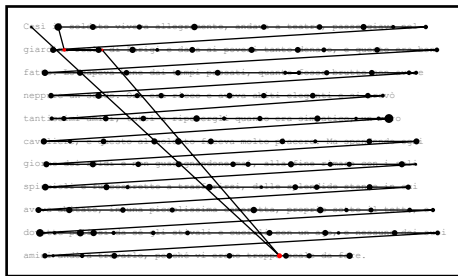

regress

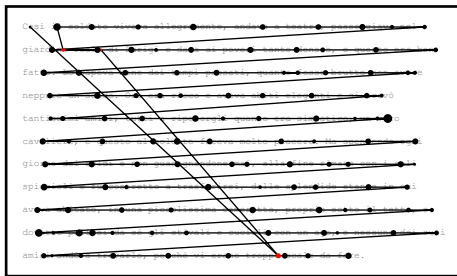

segment

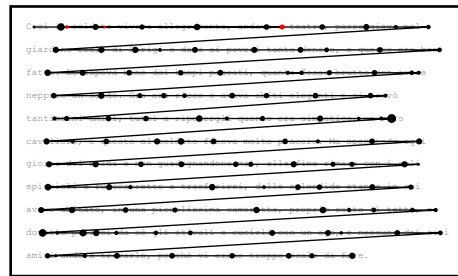

split

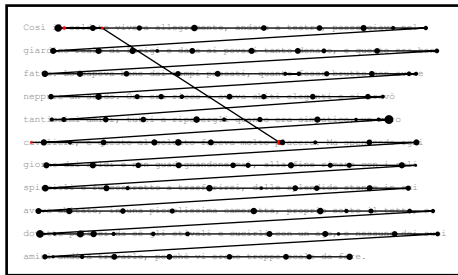

stretch

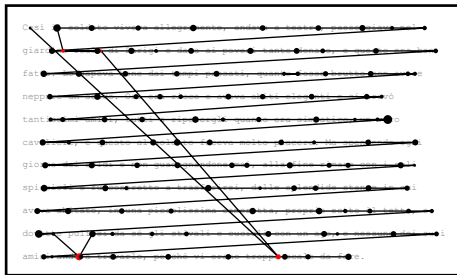

warp

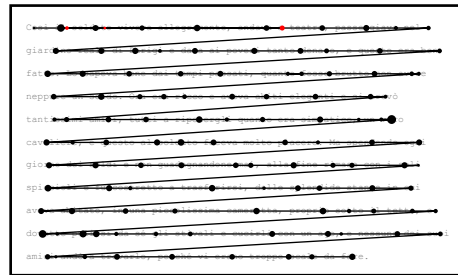

Participant 17, passage 4A (adult)

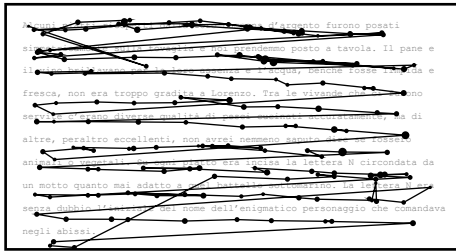

Gold standard manual correction

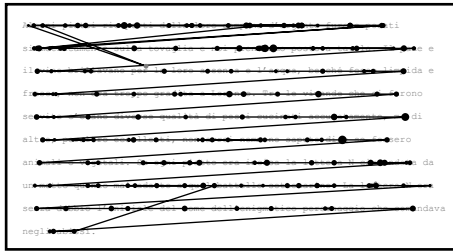

attach

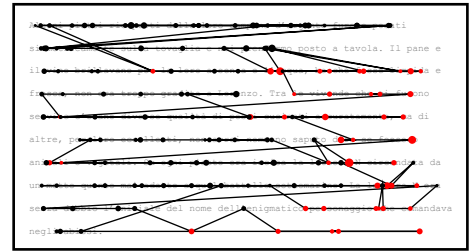

chain

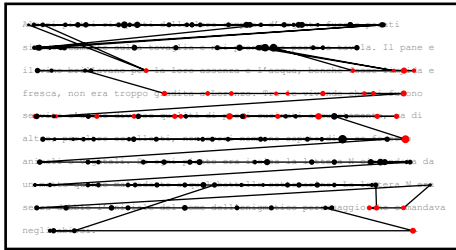

cluster

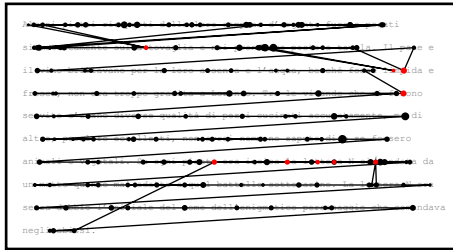

compare

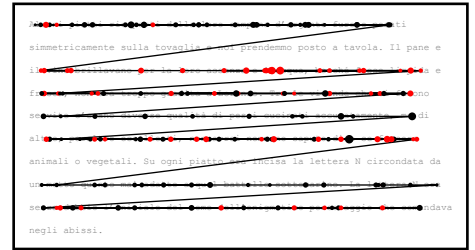

merge

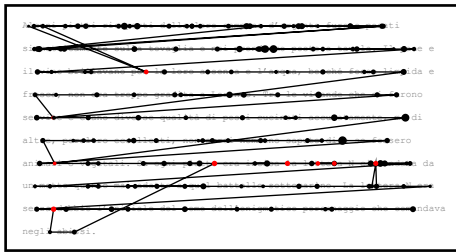

regress

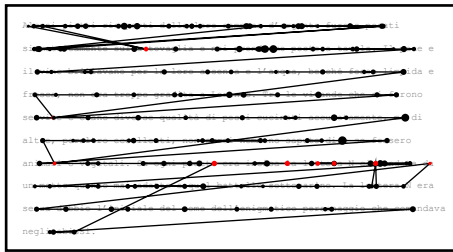

segment

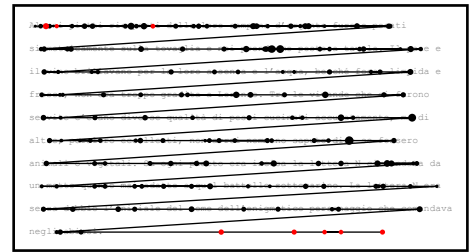

split

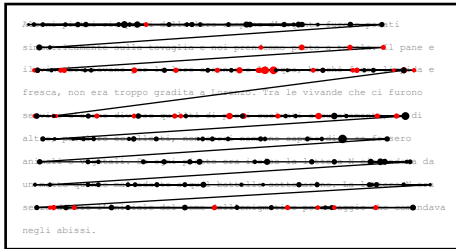

stretch

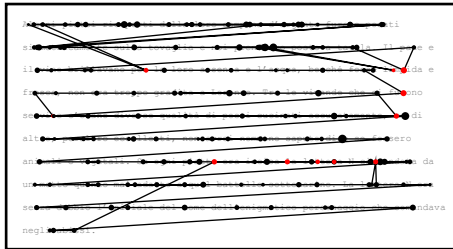

warp

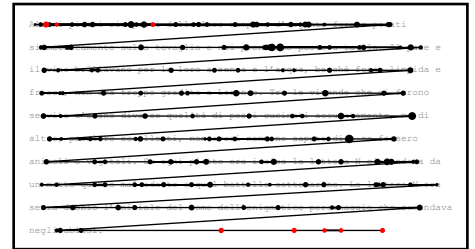







Participant 23, passage 4A (adult)

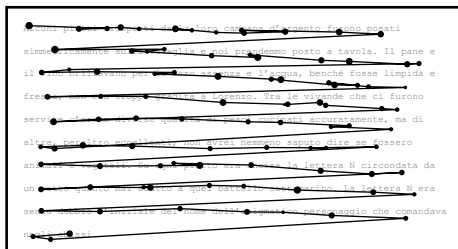

Gold standard manual correction

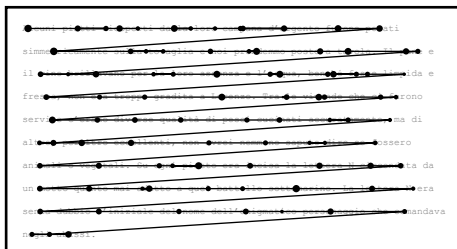

attach

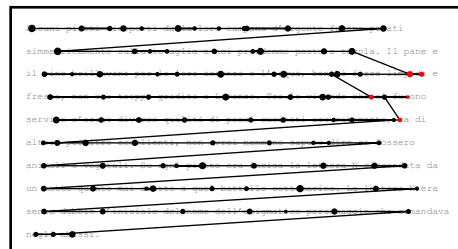

chain

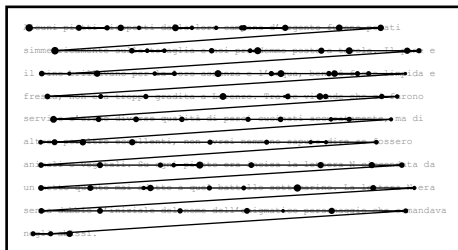

cluster

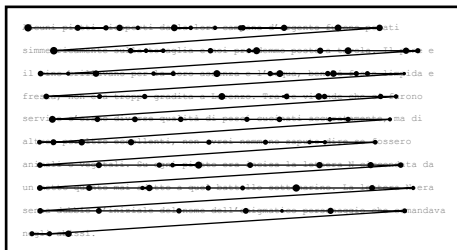

compare

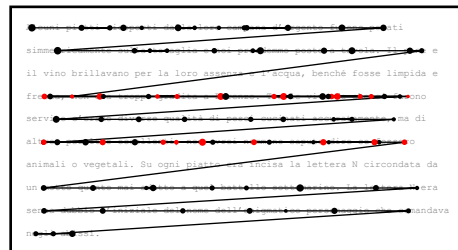

merge

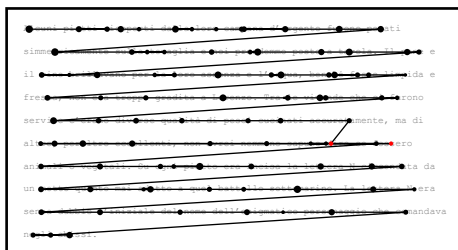

regress

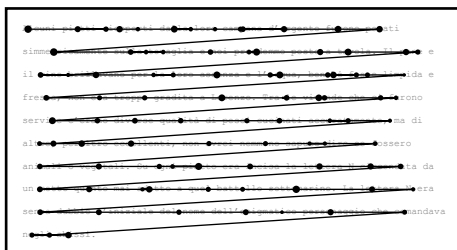

segment

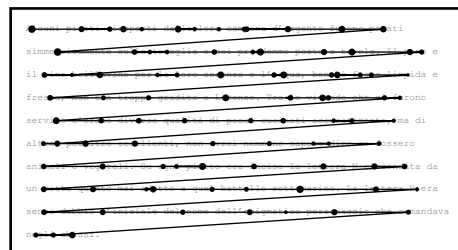

split

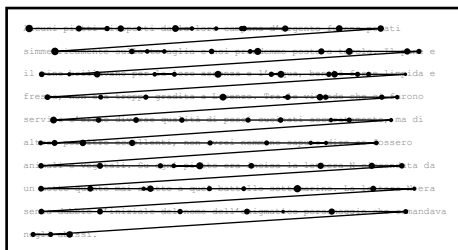

stretch

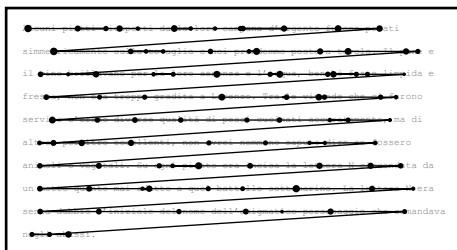

warp

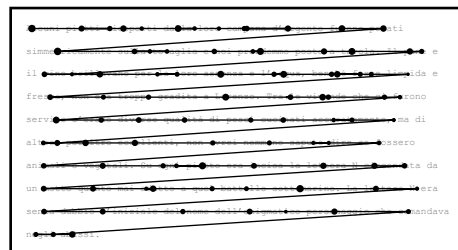





Participant 29, passage 3B (adult)

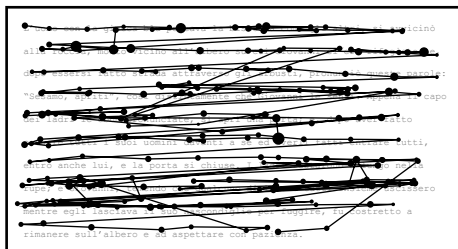

Gold standard manual correction

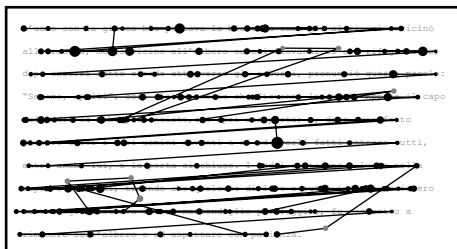

attach

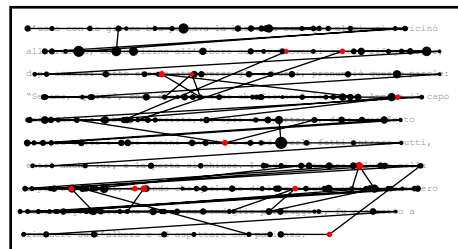

chain

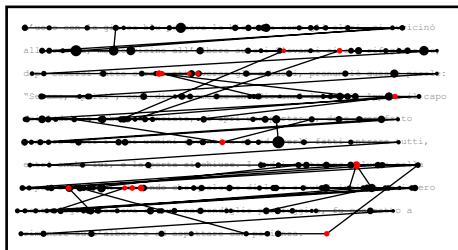

cluster

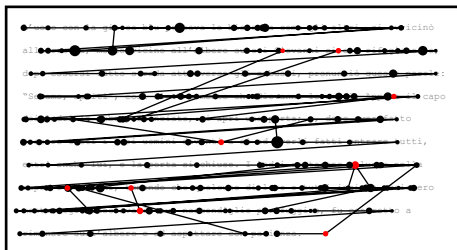

compare

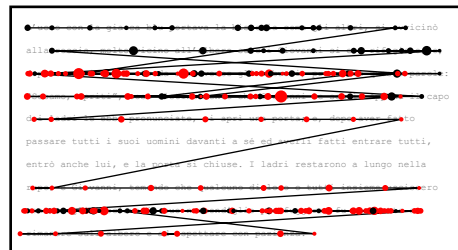

merge

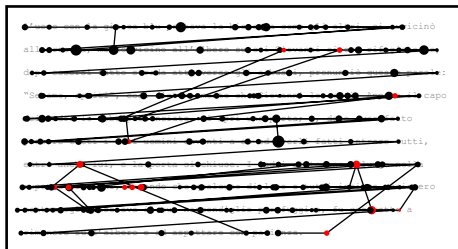

regress

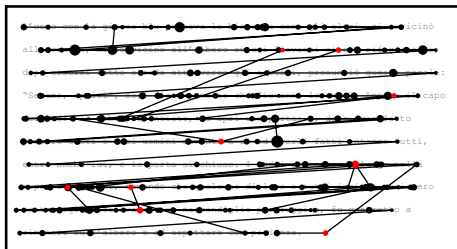

segment

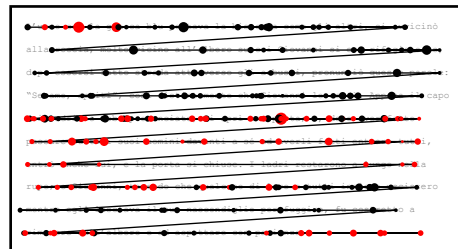

split

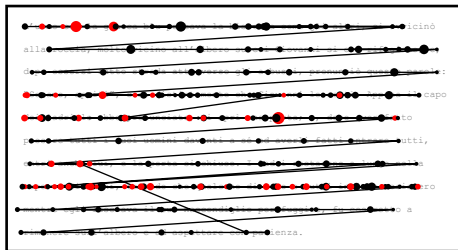

stretch

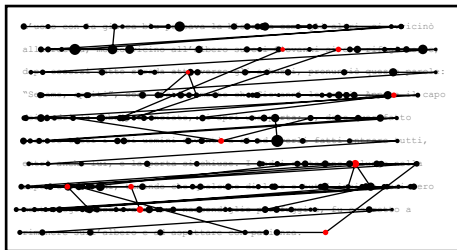

warp

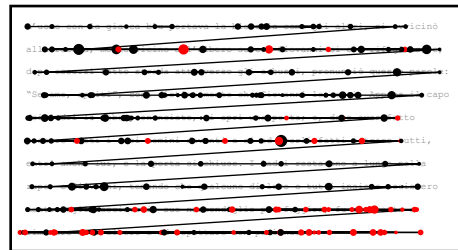

Participant 30, passage 5A (adult)

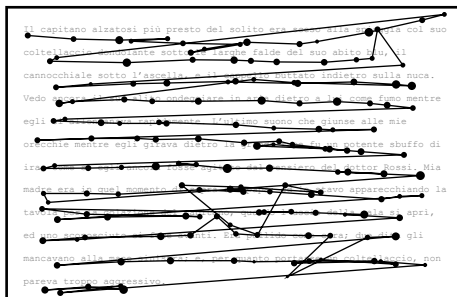

Gold standard manual correction

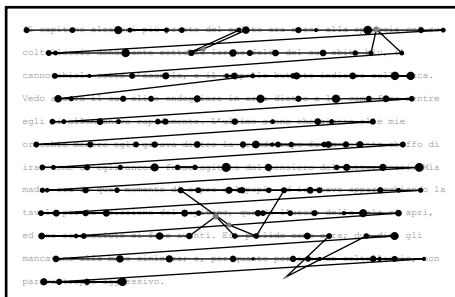

attach

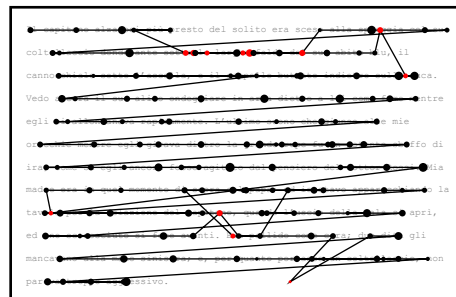

chain

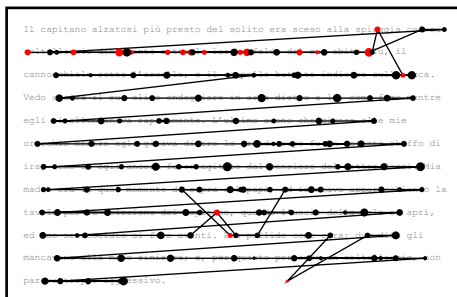

cluster

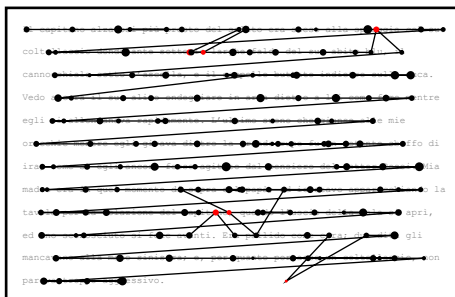

compare

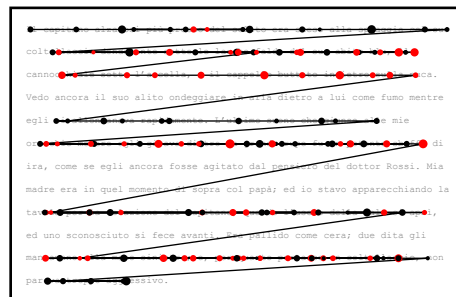

merge

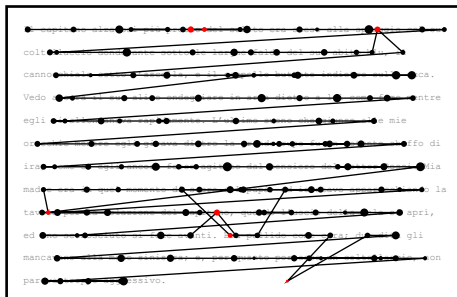

regress

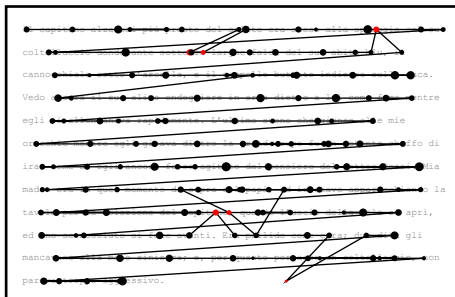

segment

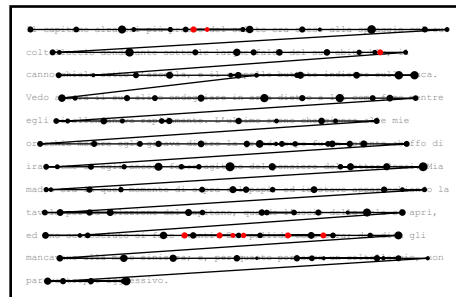

split

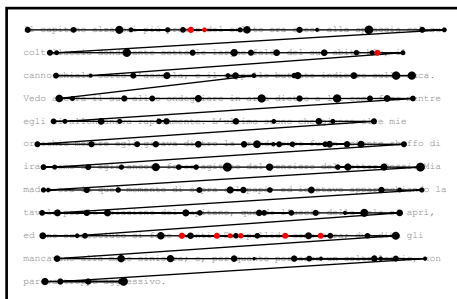

stretch

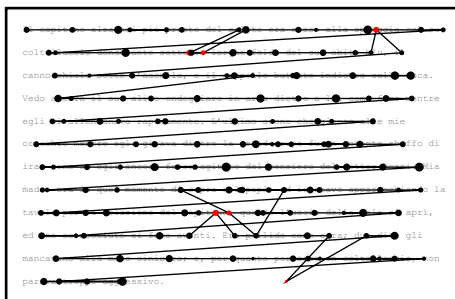

warp

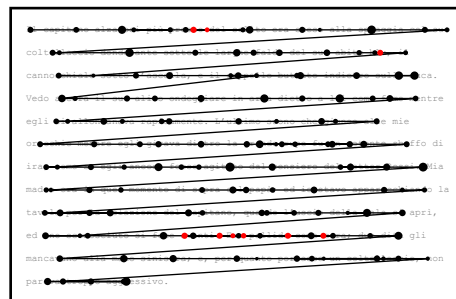

Participant 32, passage 2A (adult)

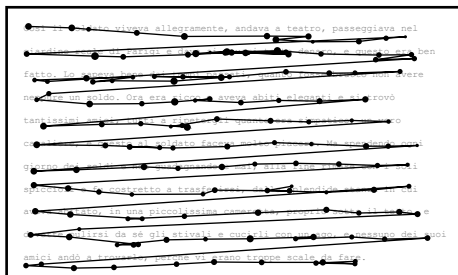

Gold standard manual correction

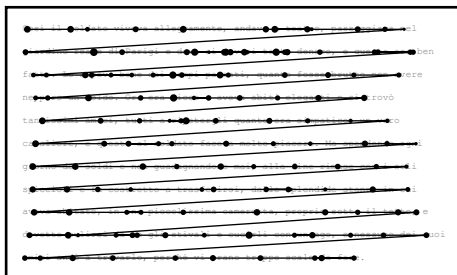

attach

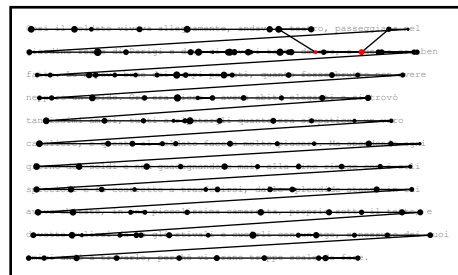

chain

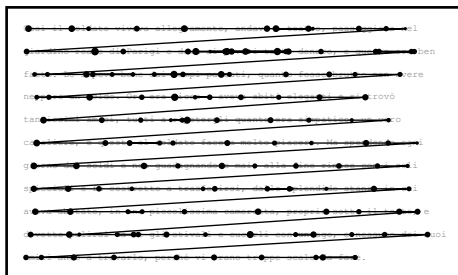

cluster

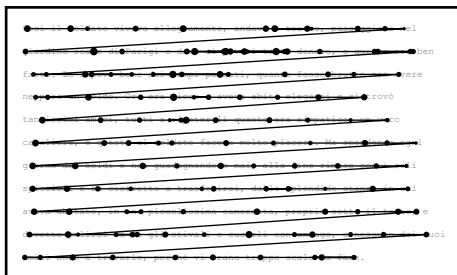

compare

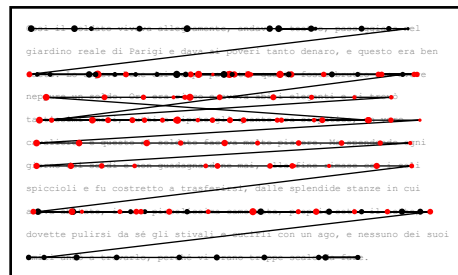

merge

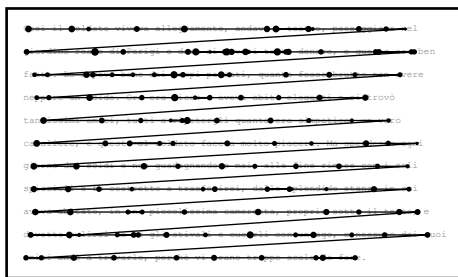

regress

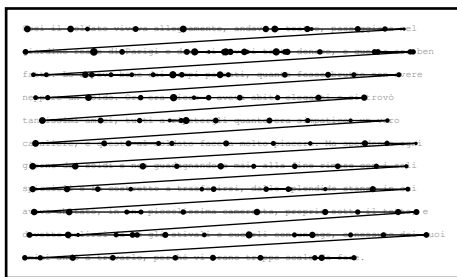

segment

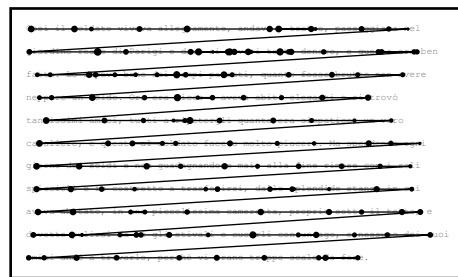

split

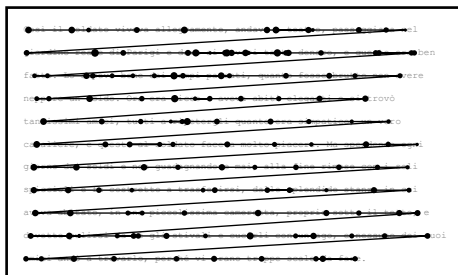

stretch

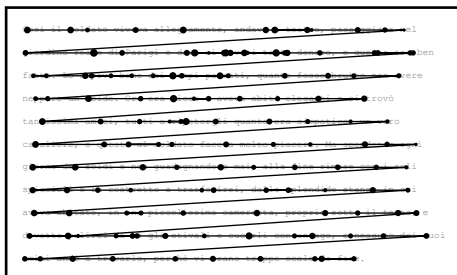

warp

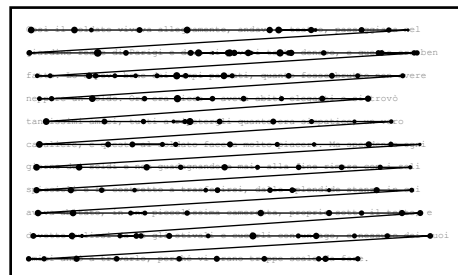

Participant 34, passage 6A (adult)

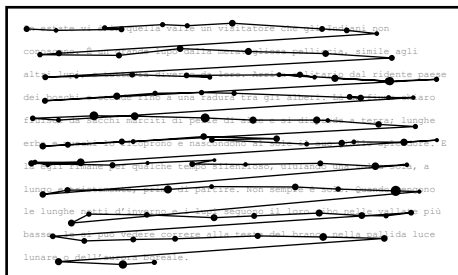

Gold standard manual correction

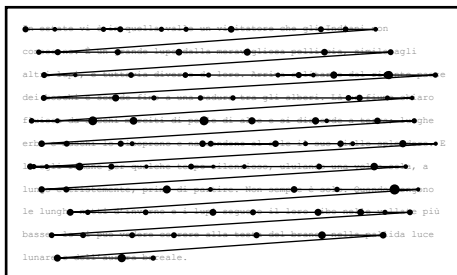

attach

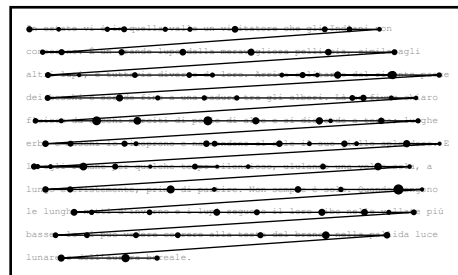

chain

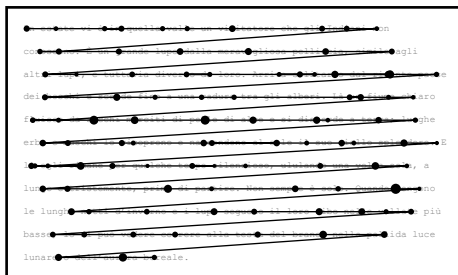

cluster

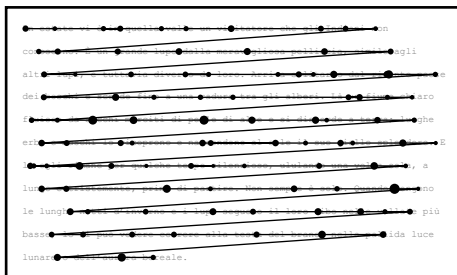

compare

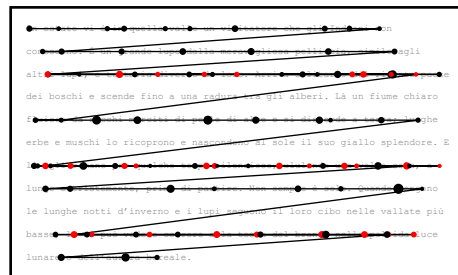

merge

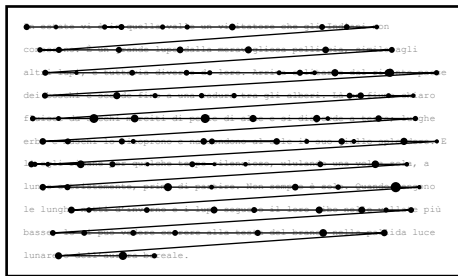

regress

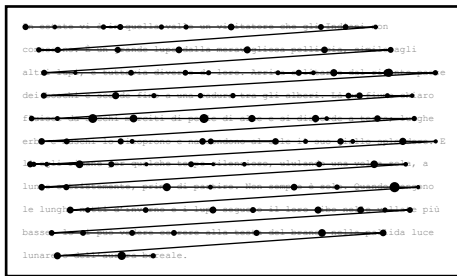

segment

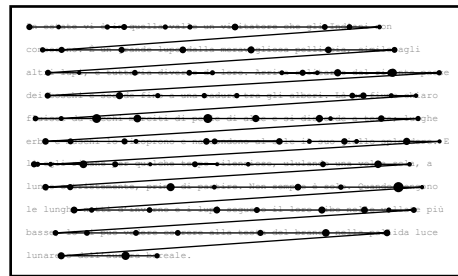

split

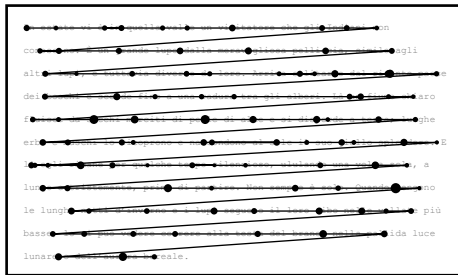

stretch

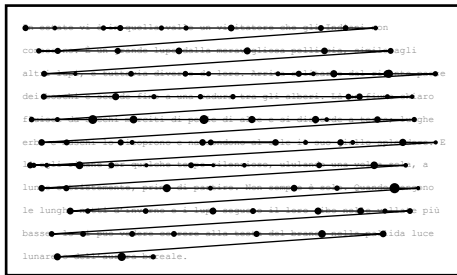

warp

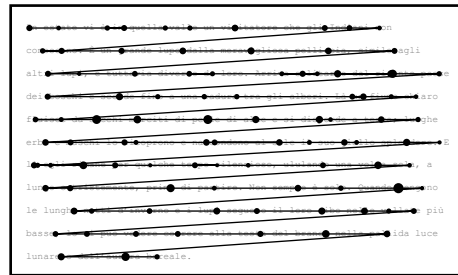

Participant 35, passage 4B (adult)

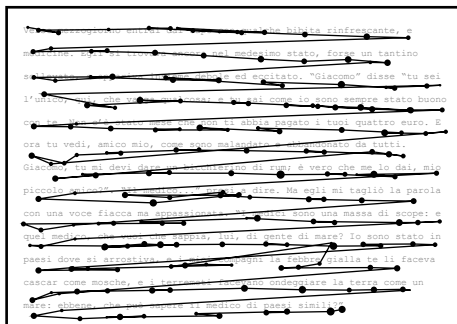

Gold standard manual correction

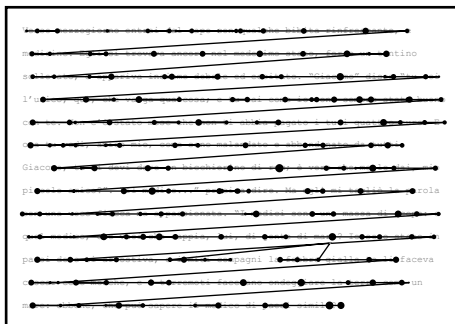

attach

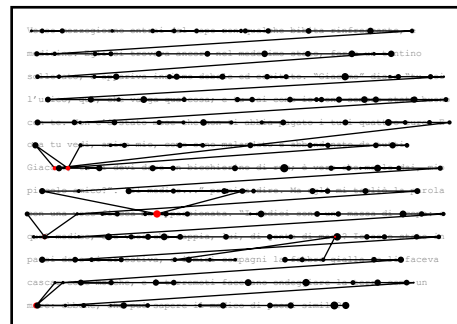

chain

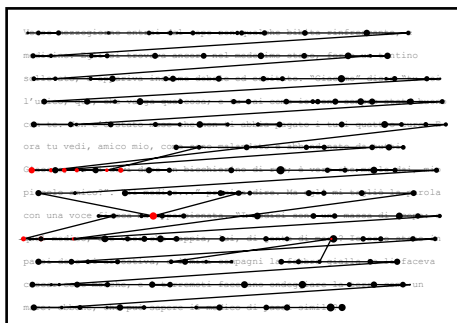

ccluster

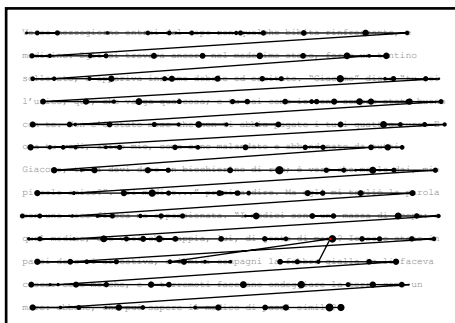

compare

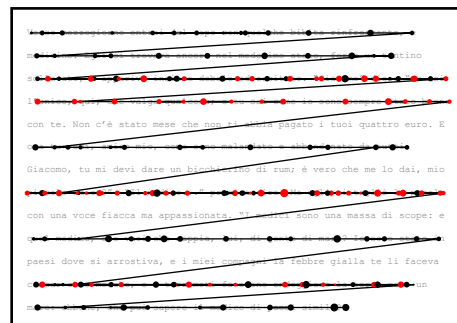

merge

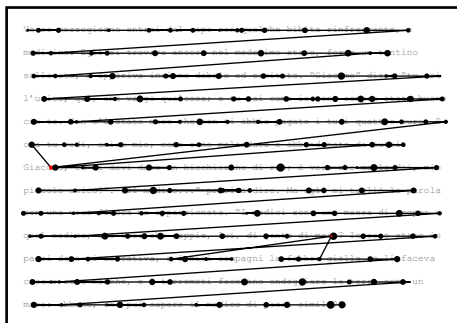

regress

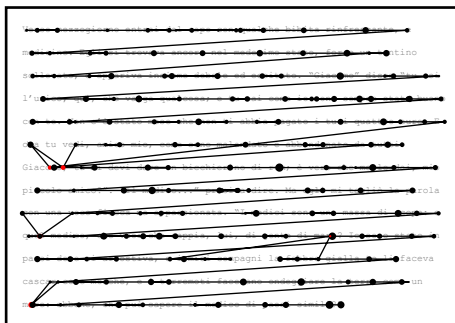

segment

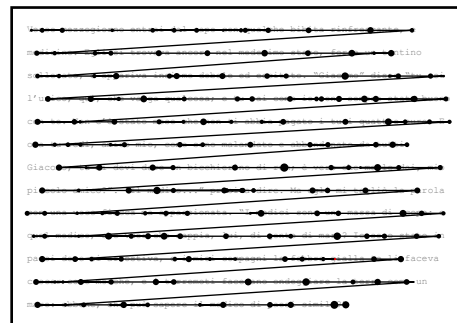

split

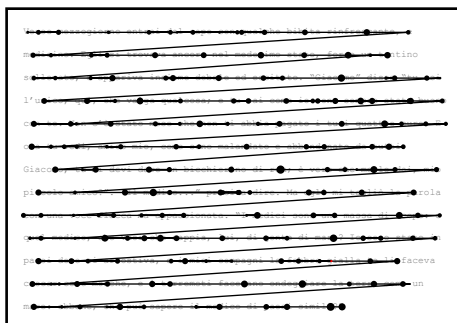

stretch

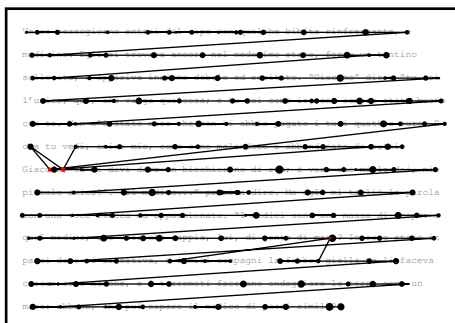

warp

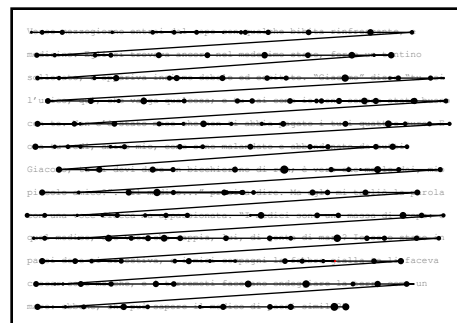

Participant 37, passage 5B (adult)

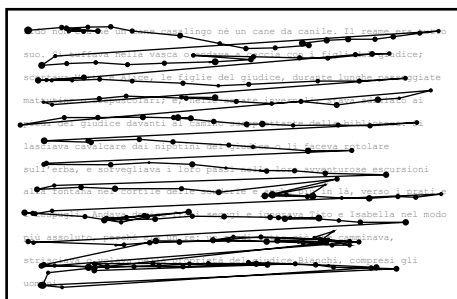

Gold standard manual correction

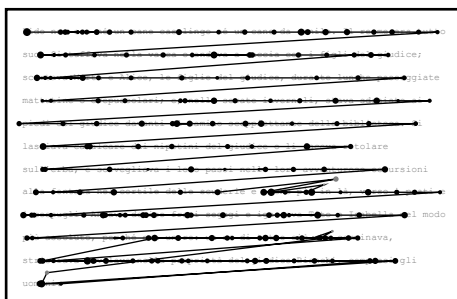

attach

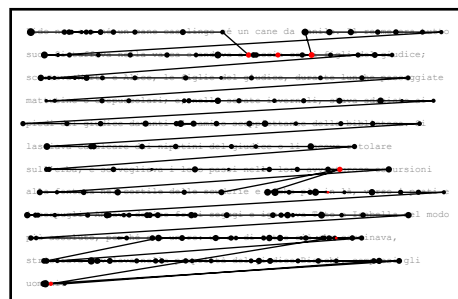

chain

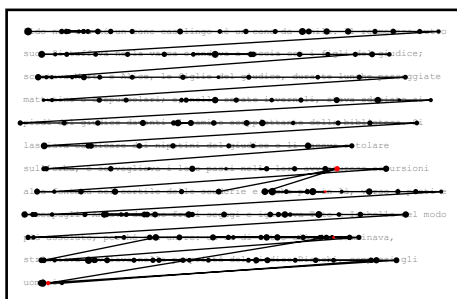

cluster

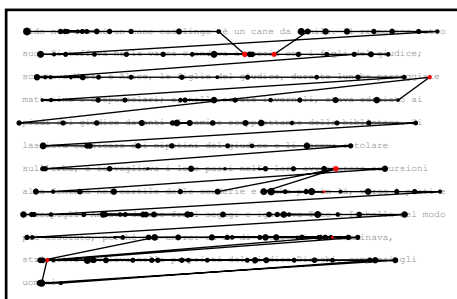

compare

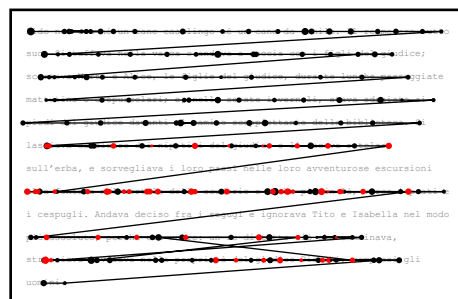

merge

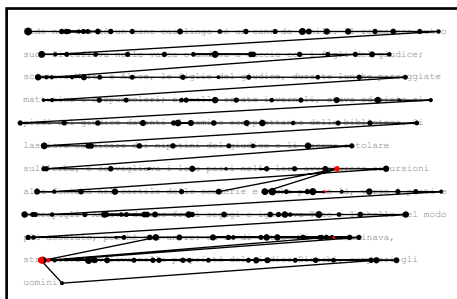

regress

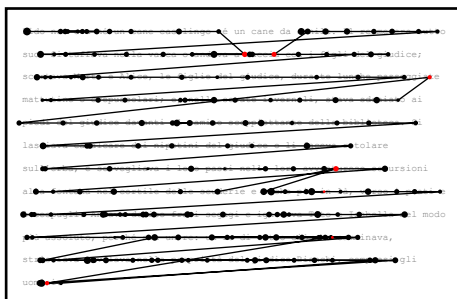

segment

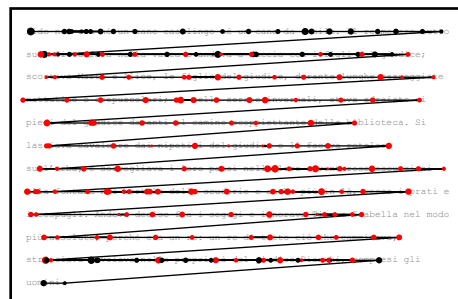

split

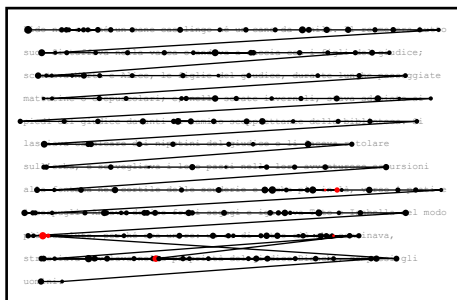

stretch

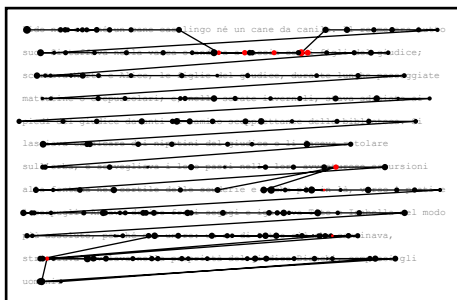

warp

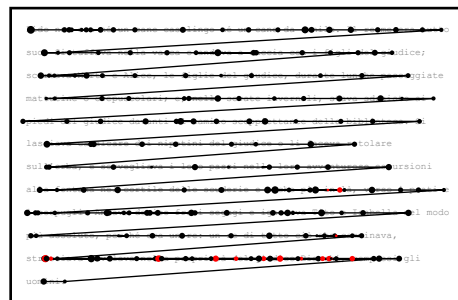



Participant 39, passage 6A (adult)

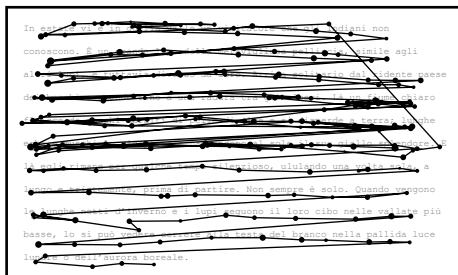

Gold standard manual correction

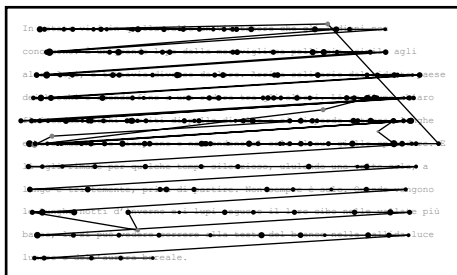

attach

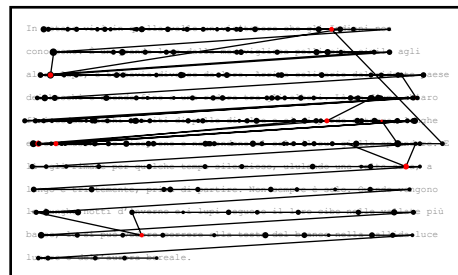

chain

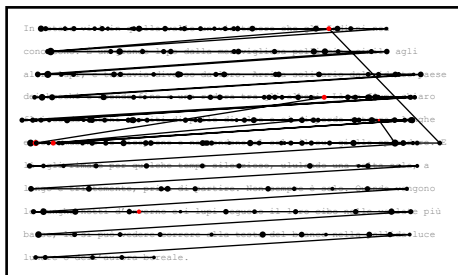

cluster

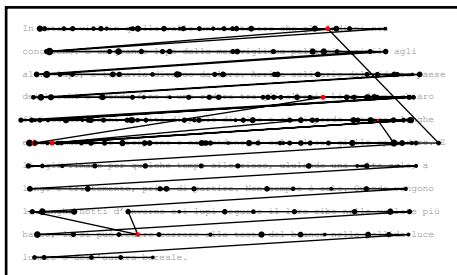

compare

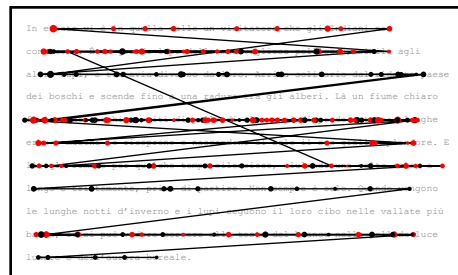

merge

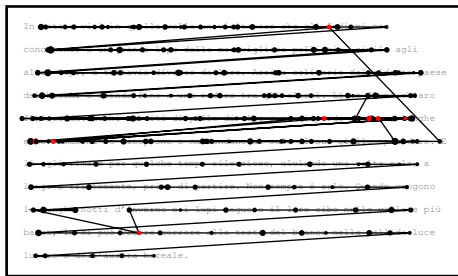

regress

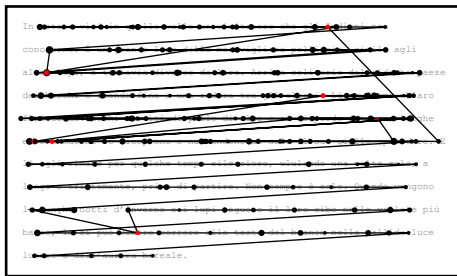

segment

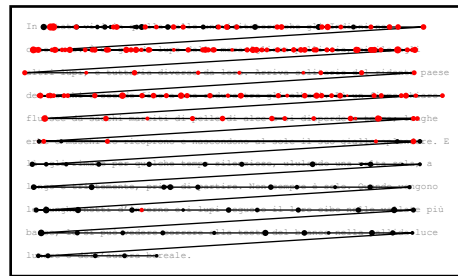

split

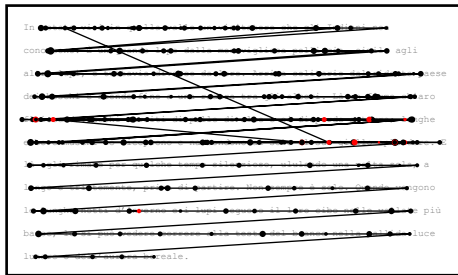

stretch

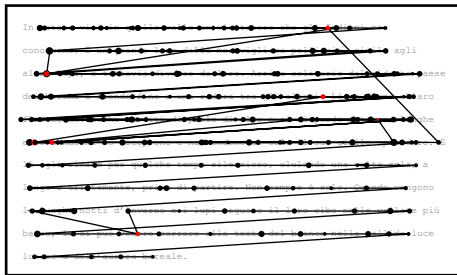

warp

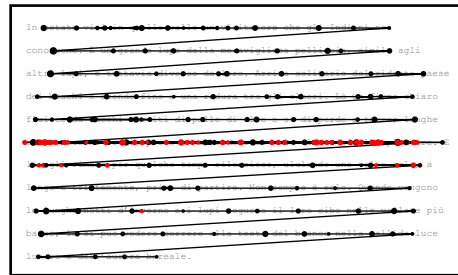





Participant 140, passage 5B (child)

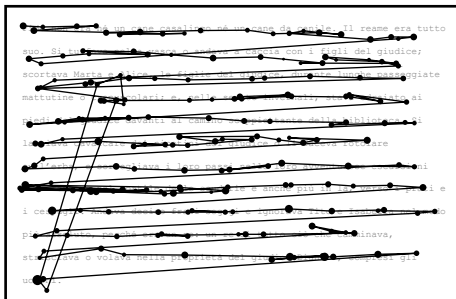

Gold standard manual correction

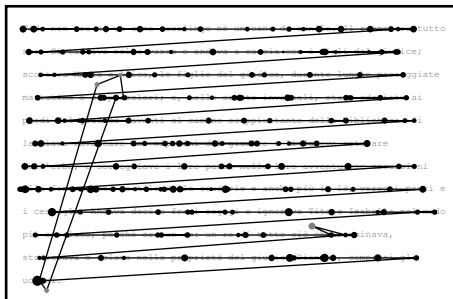

attach

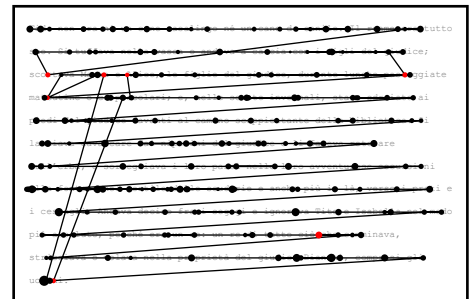

chain

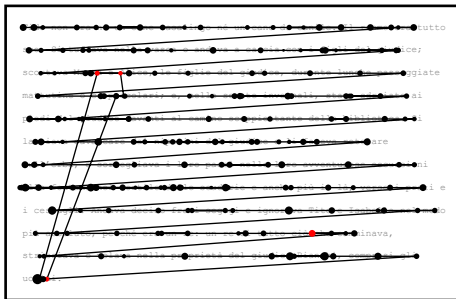

cluster

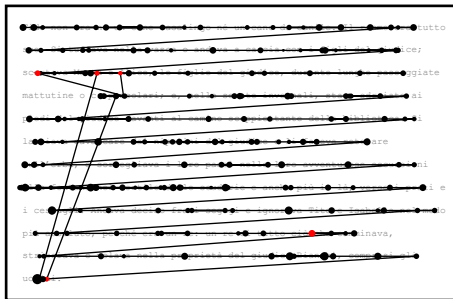

compare

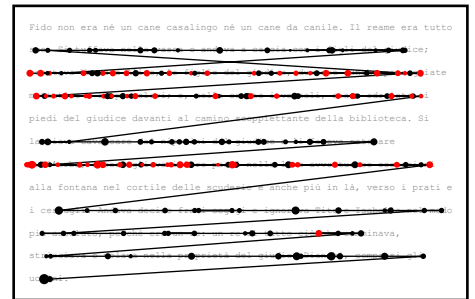

merge

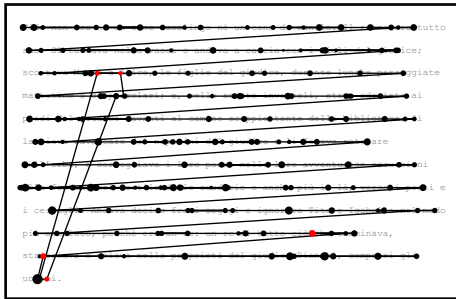

regress

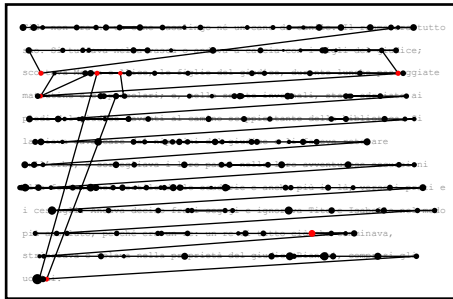

segment

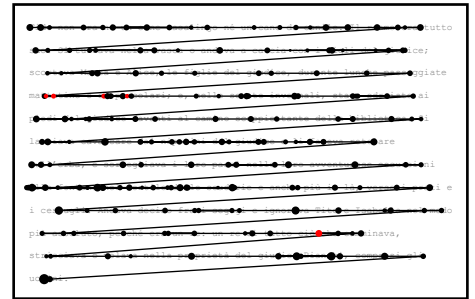

split

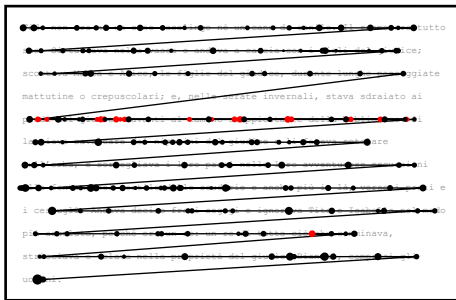

stretch

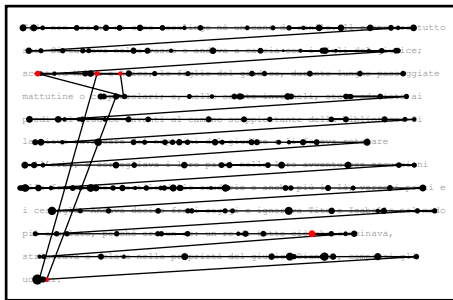

warp

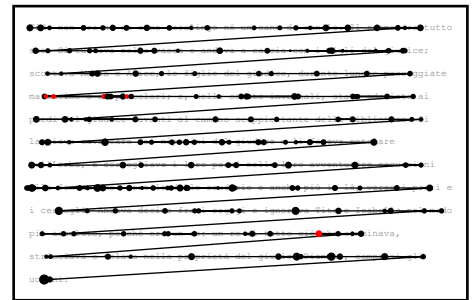

Participant 152, passage 1A (child)

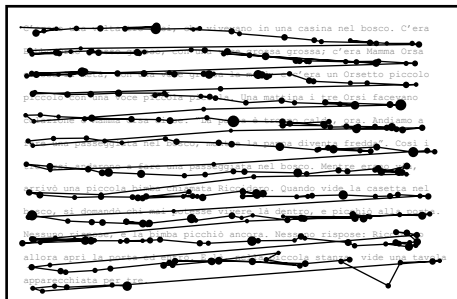

Gold standard manual correction

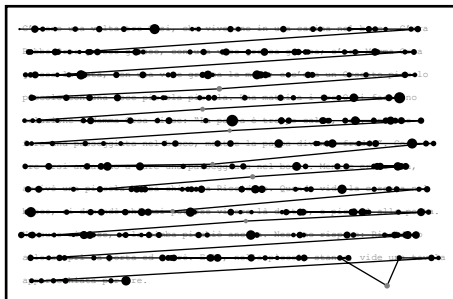

attach

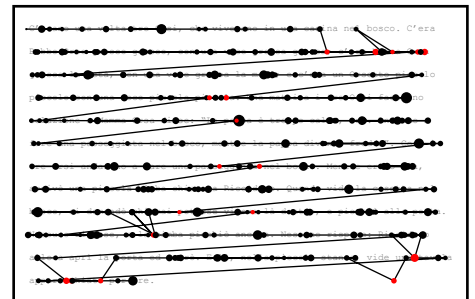

chain

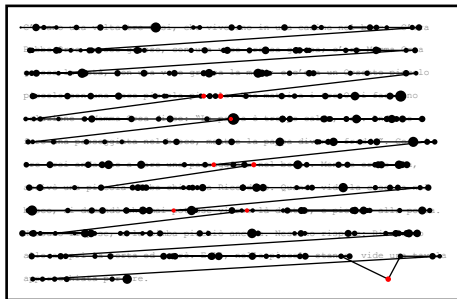

cluster

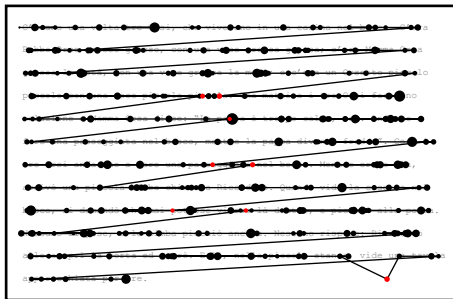

compare

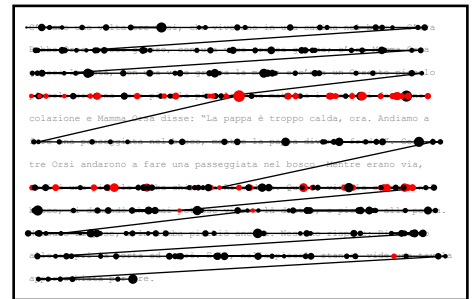

merge

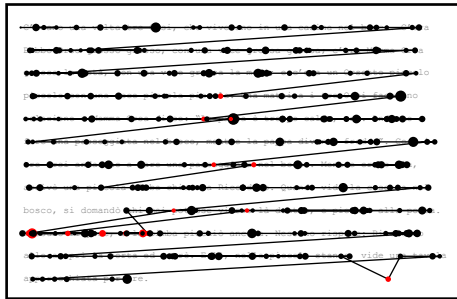

regress

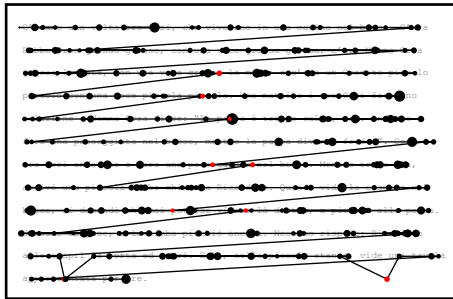

segment

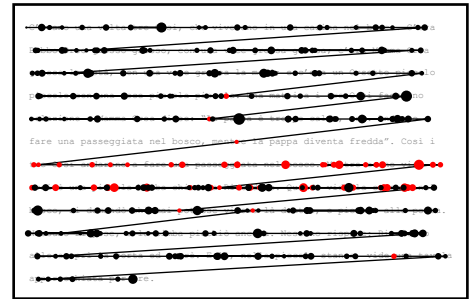

split

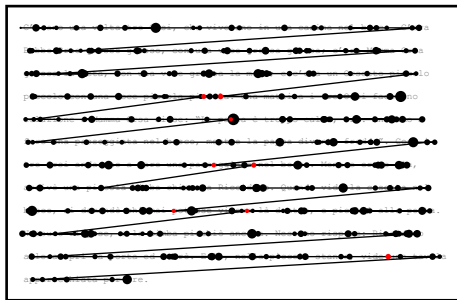

stretch

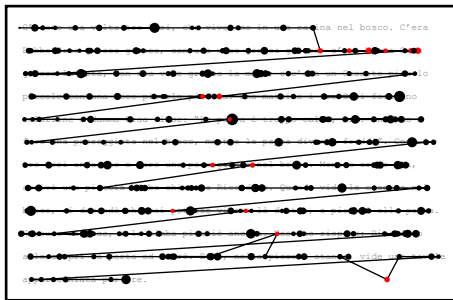

warp

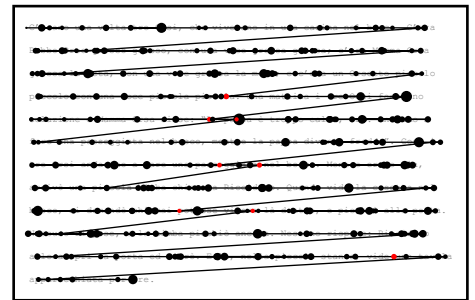



Participant 175, passage 3A (child)

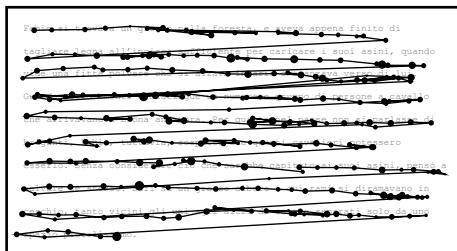

Gold standard manual correction

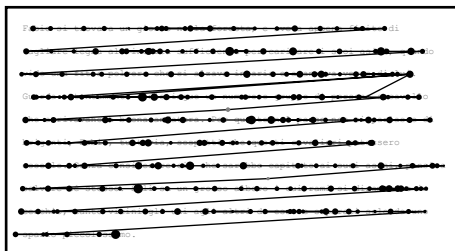

attach

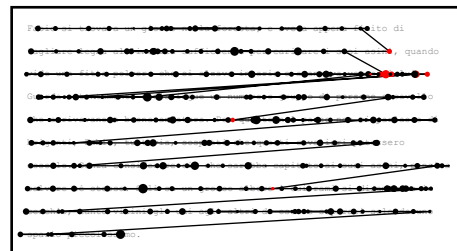

chain

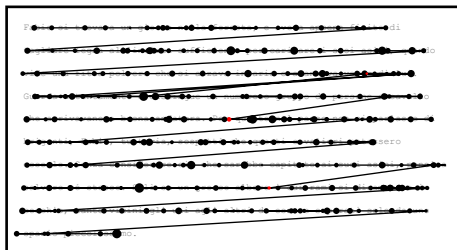

cluster

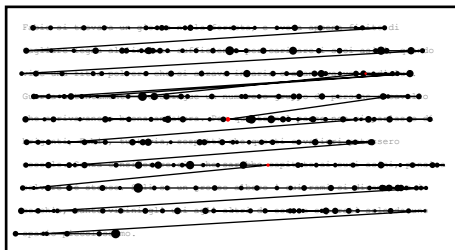

compare

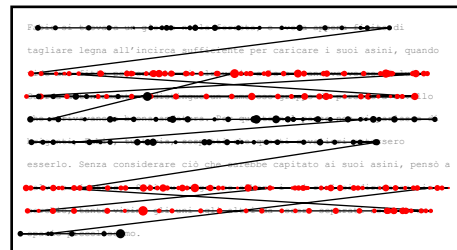

merge

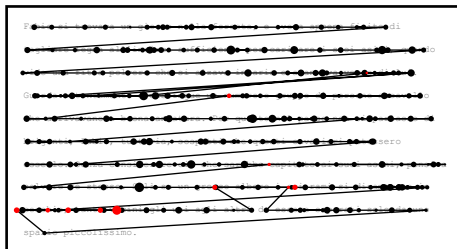

regress

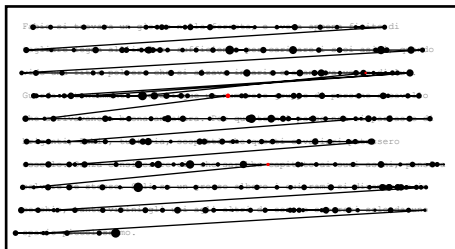

segment

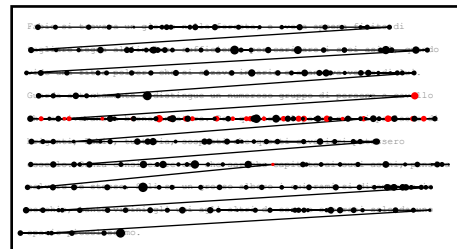

split

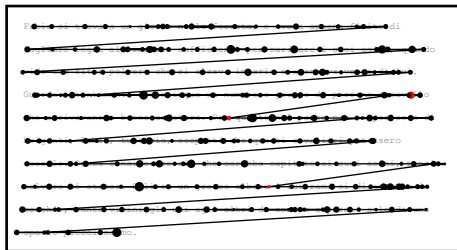

stretch

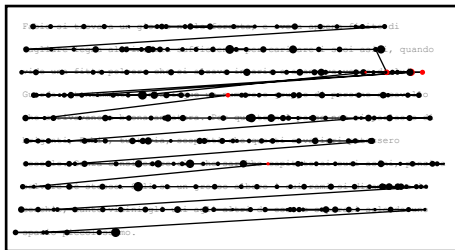

warp

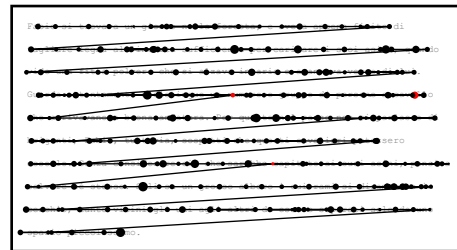

Participant 200, passage 6B (child)

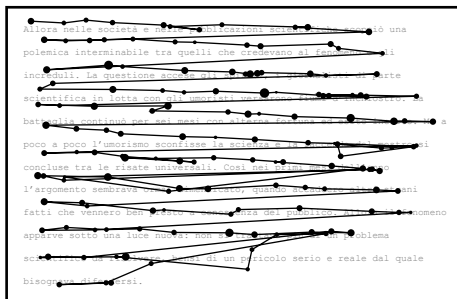

Gold standard manual correction

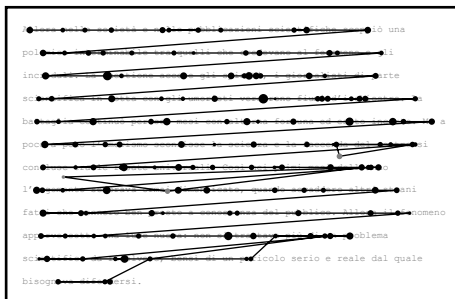

attach

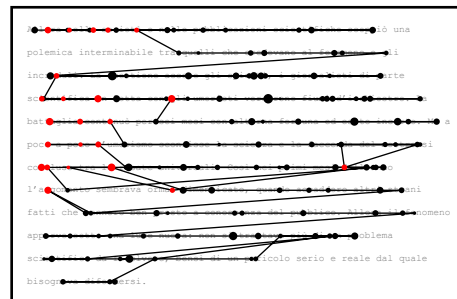

chain

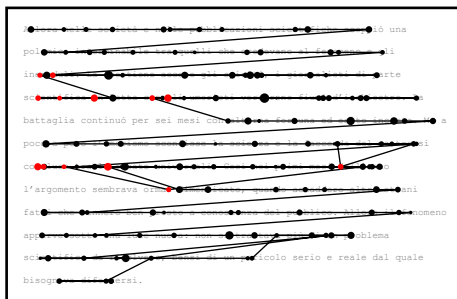

cluster

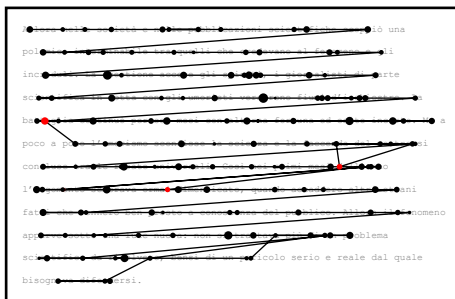

compare

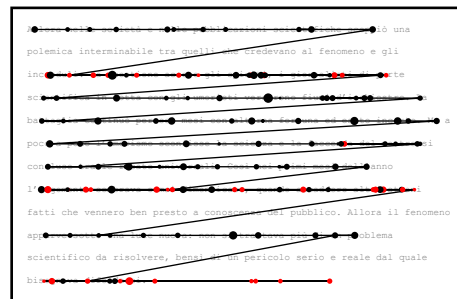

merge

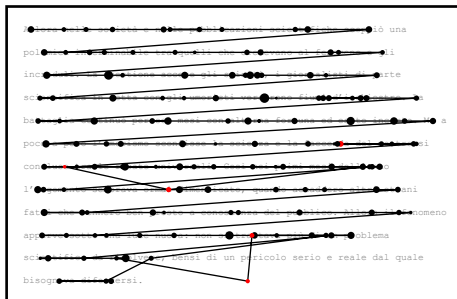

regress

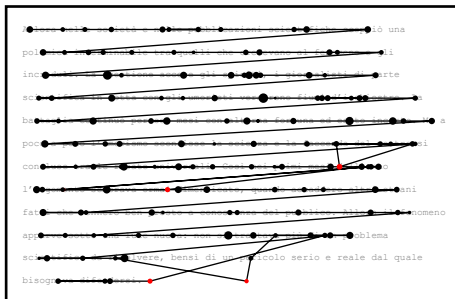

segment

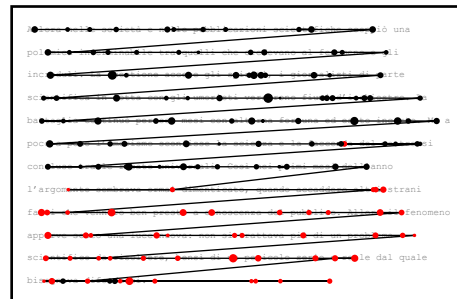

split

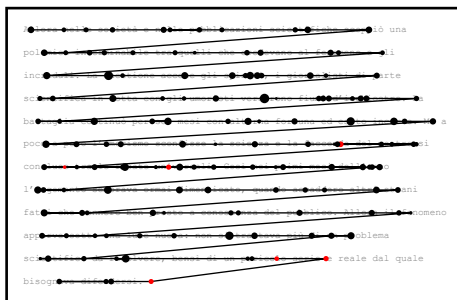

stretch

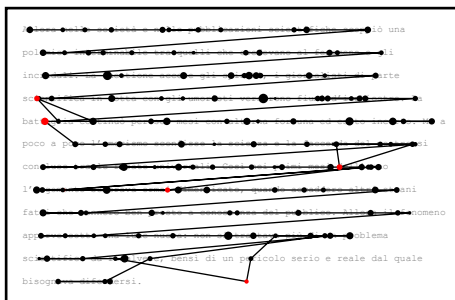

warp

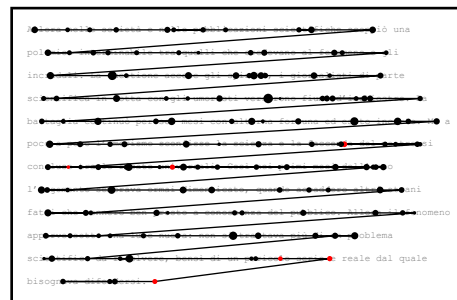

Participant 204, passage 4A (child)

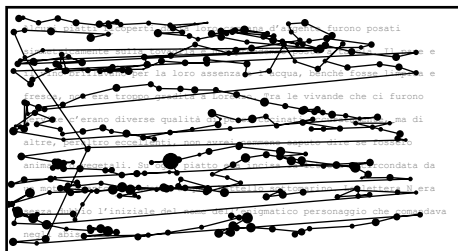

Gold standard manual correction

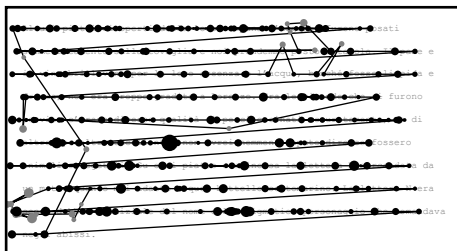

attach

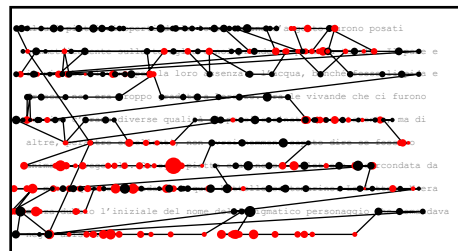

chain

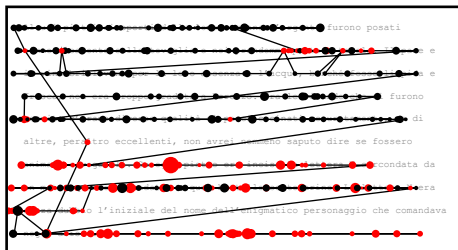

cluster

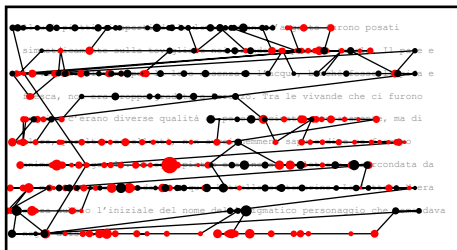

compare

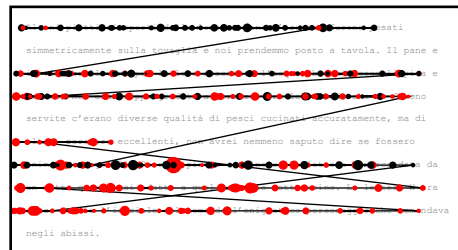

merge

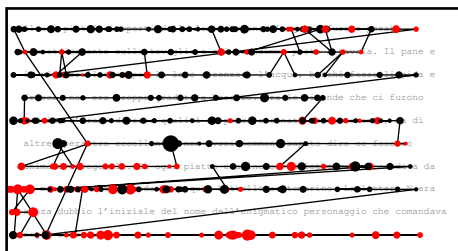

regress

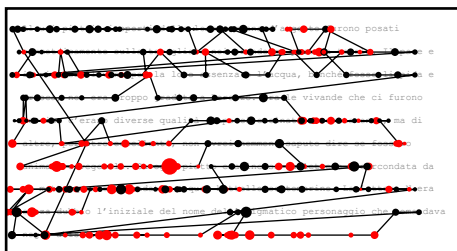

segment

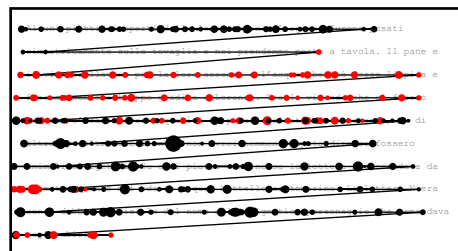

split

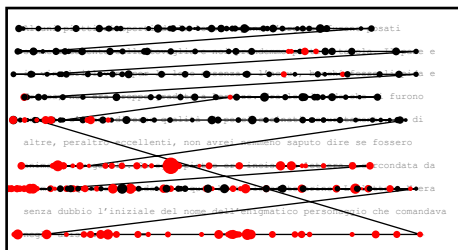

stretch

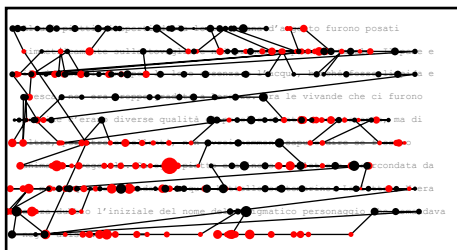

warp

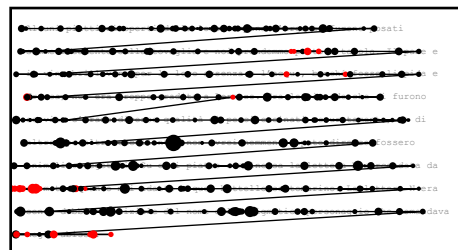

Participant 206, passage 5A (child)

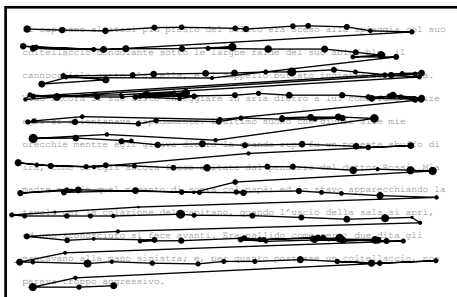

Gold standard manual correction

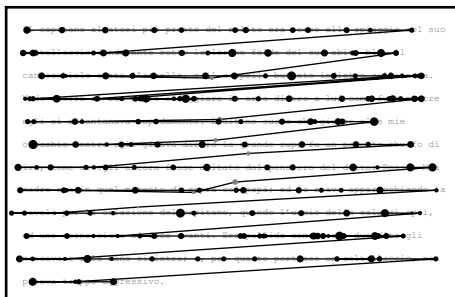

attach

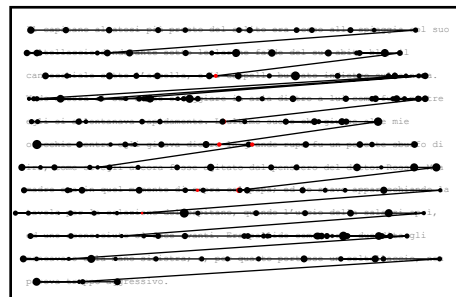

chain

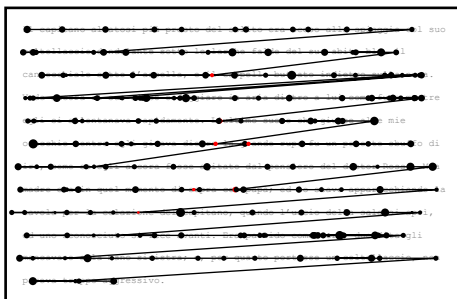

cluster

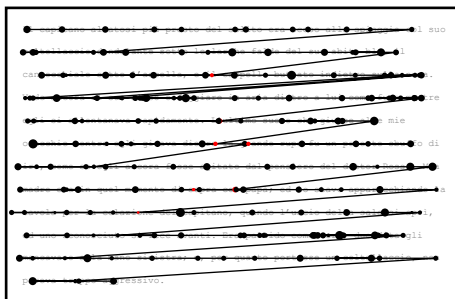

compare

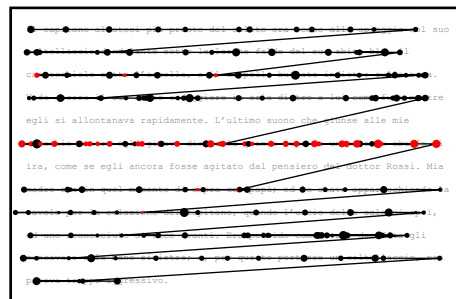

merge

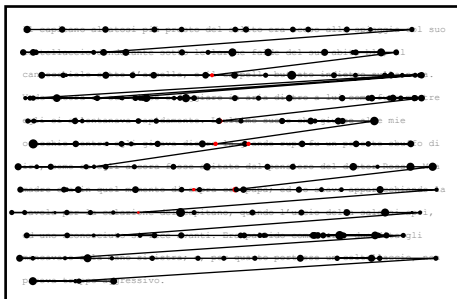

regress

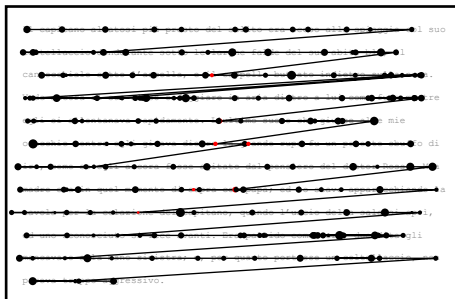

segment

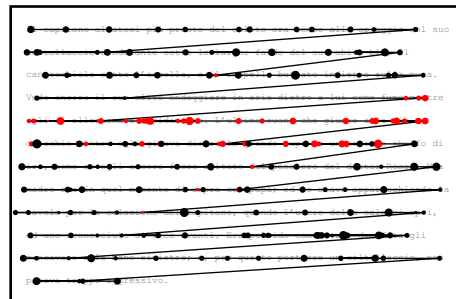

split

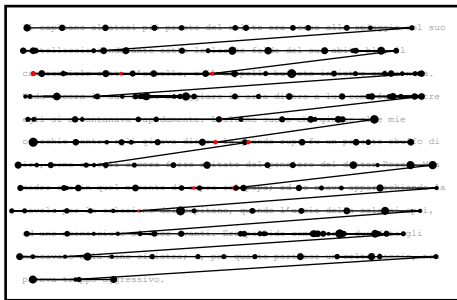

stretch

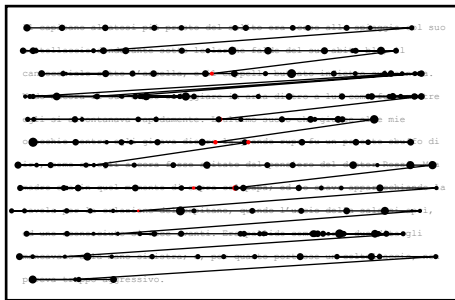

warp

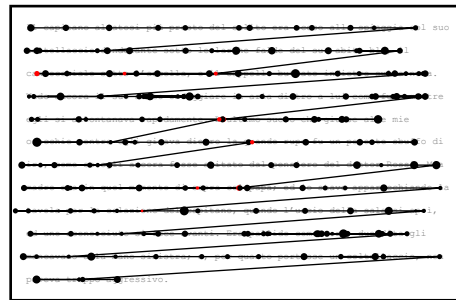



Participant 222, passage 5B (child)

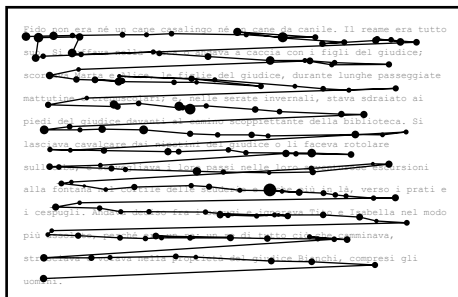

Gold standard manual correction

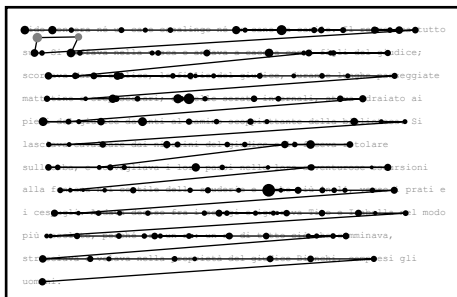

attach

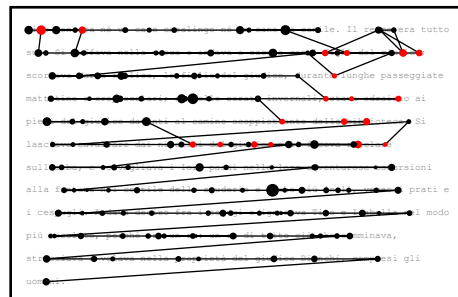

chain

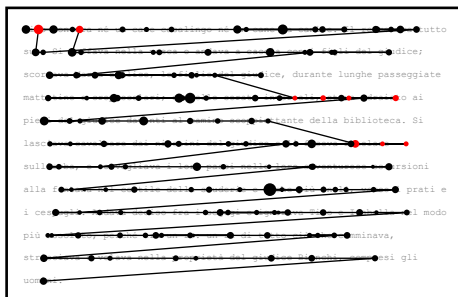

cluster

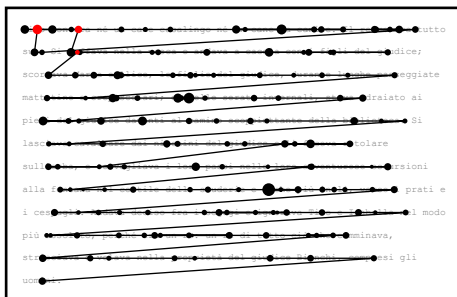

compare

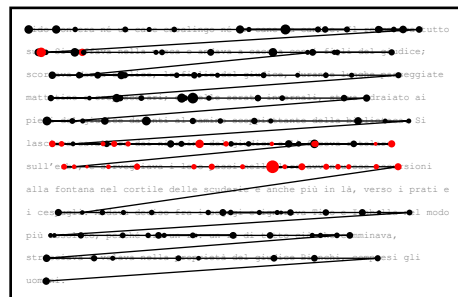

merge

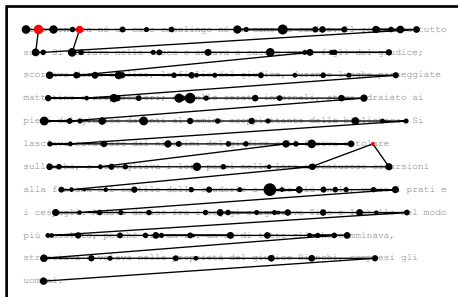

regress

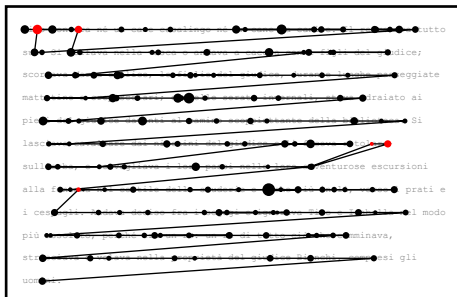

segment

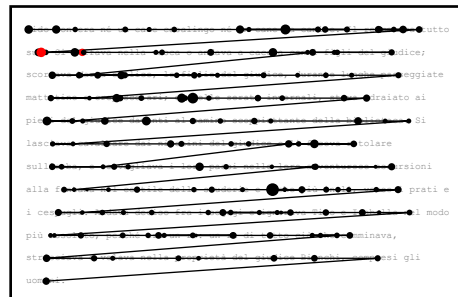

split

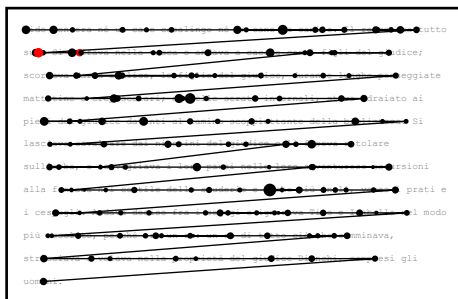

stretch

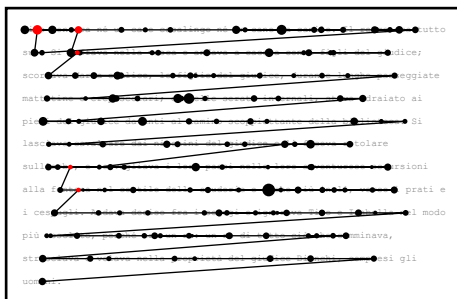

warp

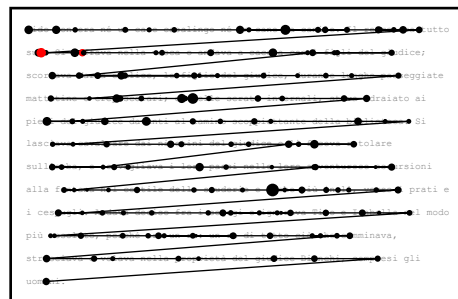

Participant 227, passage 3B (child)

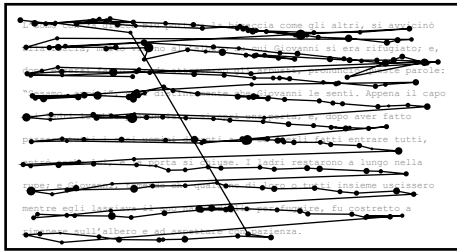

Gold standard manual correction

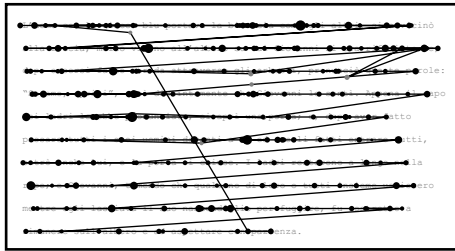

attach

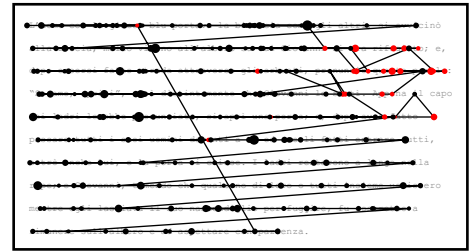

chain

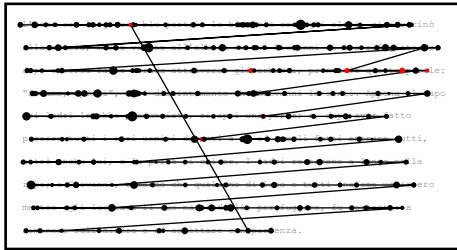

cluster

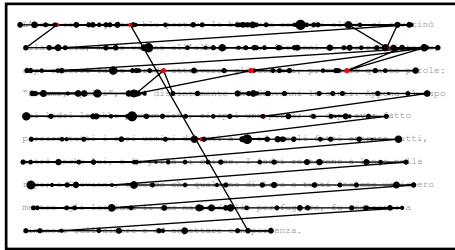

compare

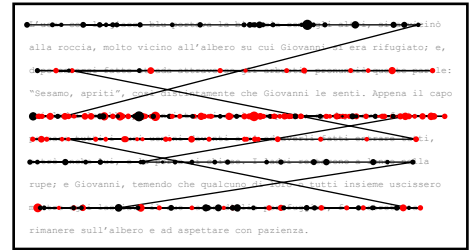

merge

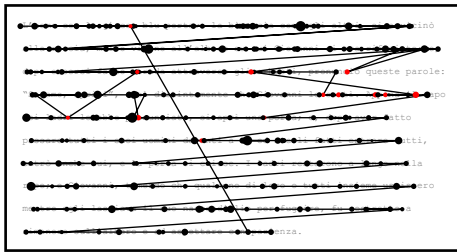

regress

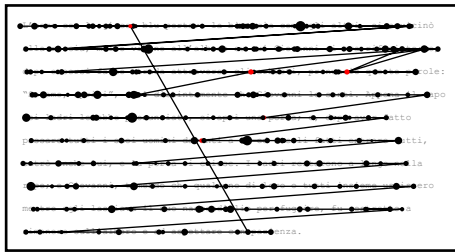

segment

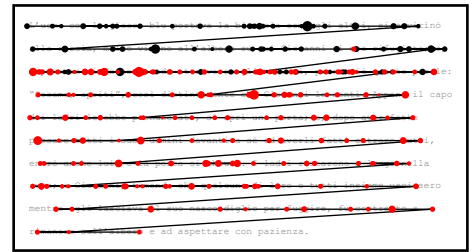

split

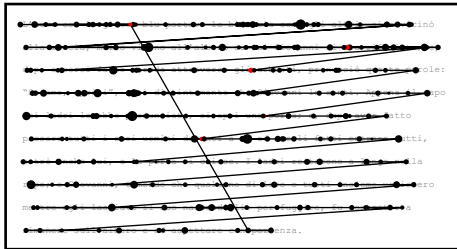

stretch

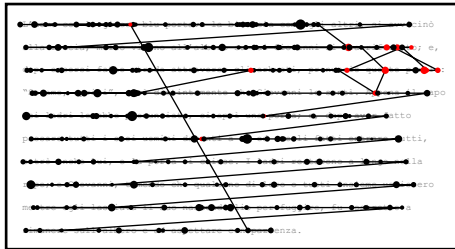

warp

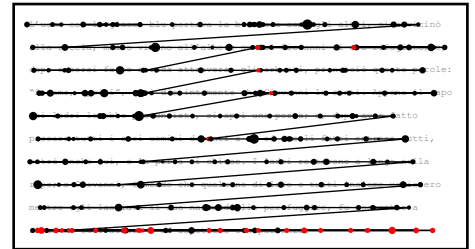

Participant 247, passage 2A (child)

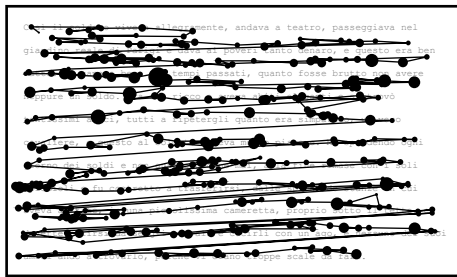

Gold standard manual correction

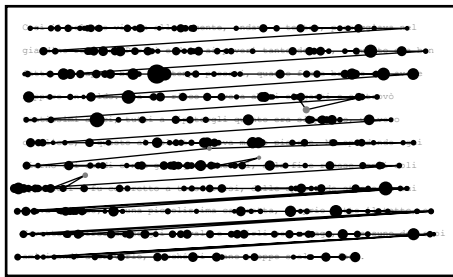

attach

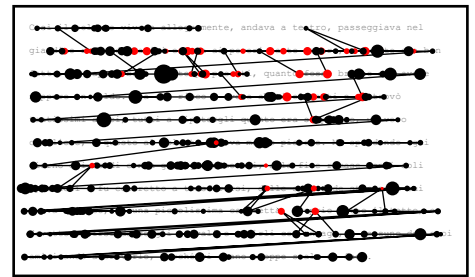

chain

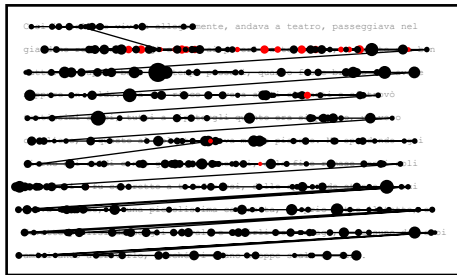

ccluster

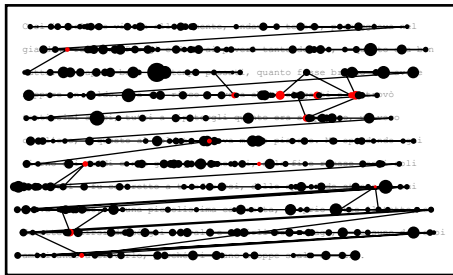

compare

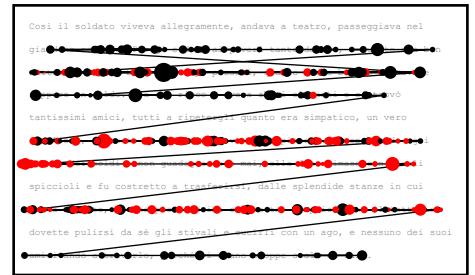

merge

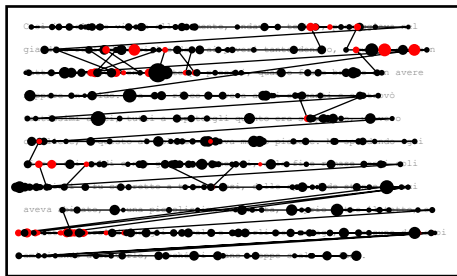

regress

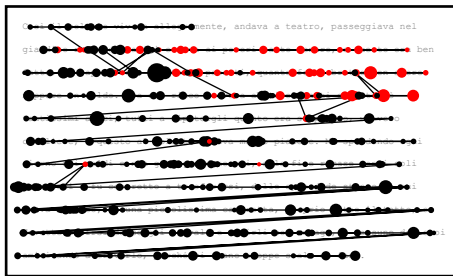

segment

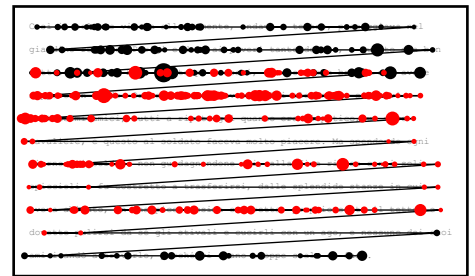

split

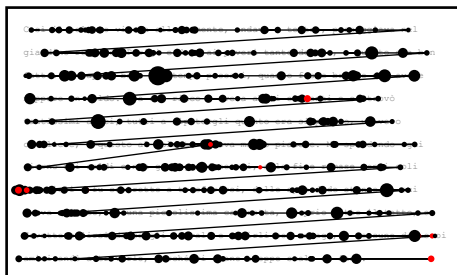

stretch

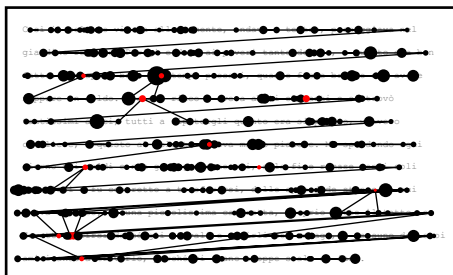

warp

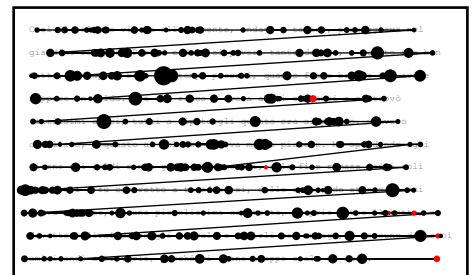

Participant 253, passage 1B (child)

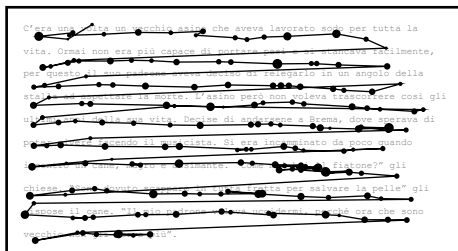

Gold standard manual correction

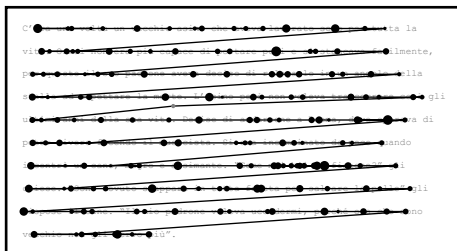

attach

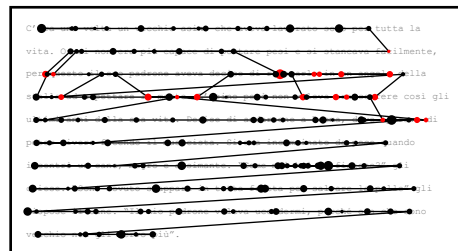

chain

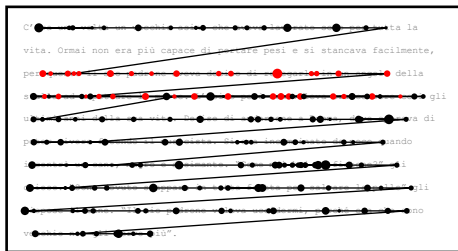

cluster

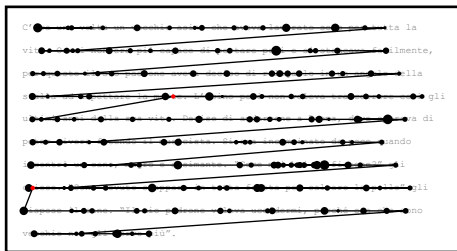

compare

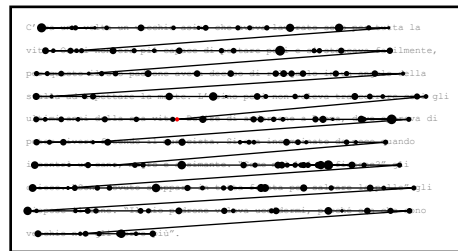

merge

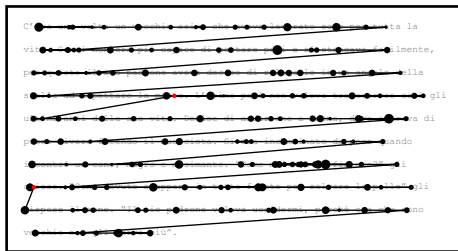

regress

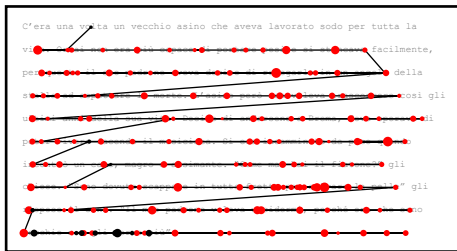

segment

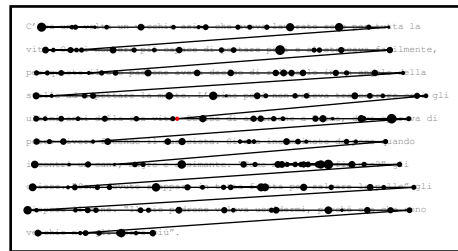

split

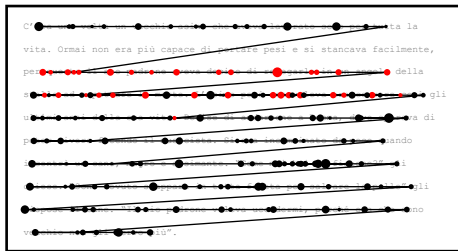

stretch

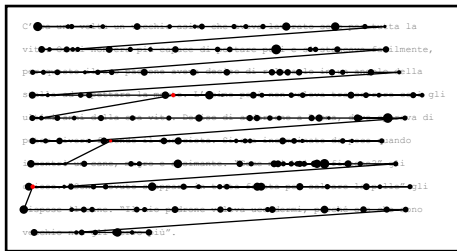

warp

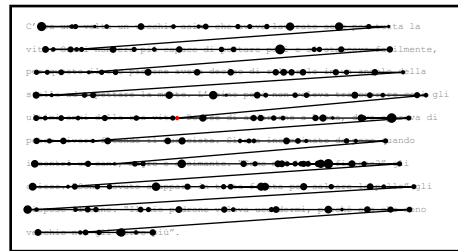



Participant 272, passage 6A (child)

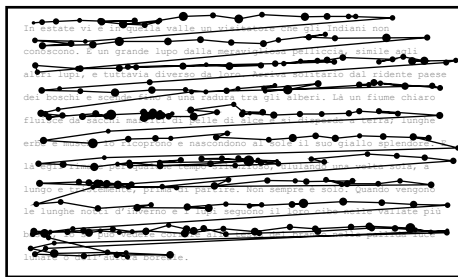

Gold standard manual correction

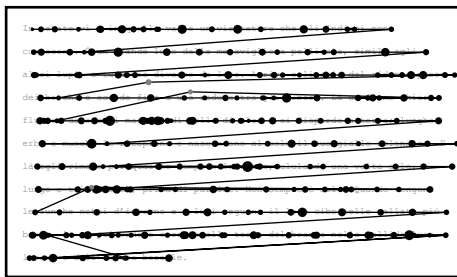

attach

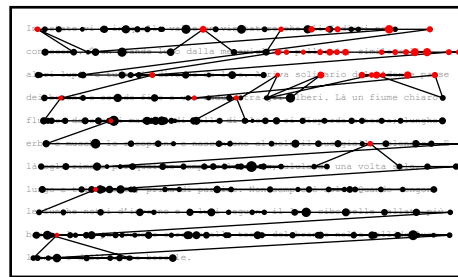

chain

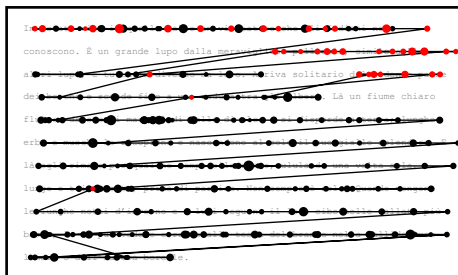

ccluster

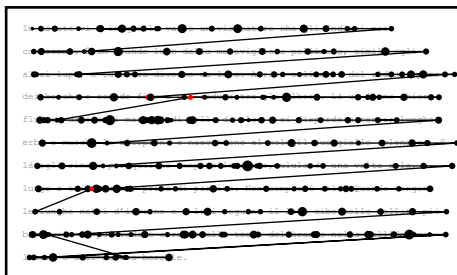

compare

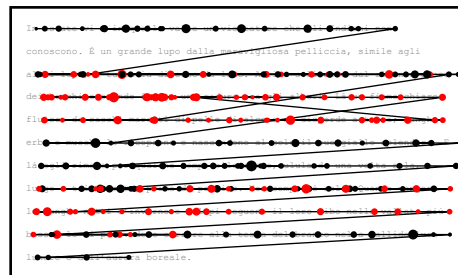

merge

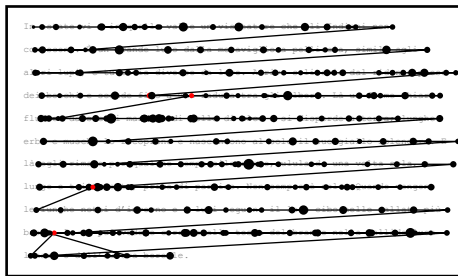

regress

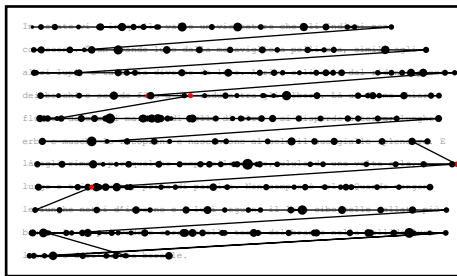

segment

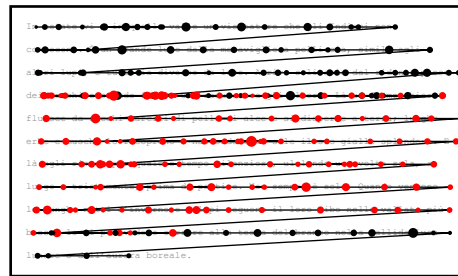

split

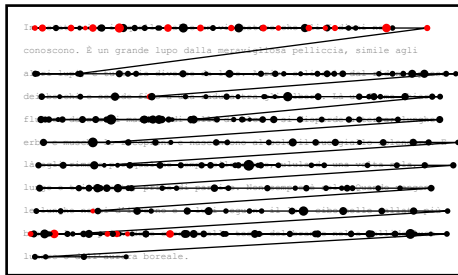

stretch

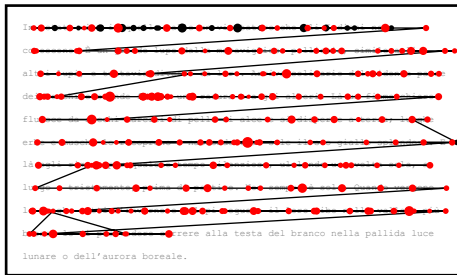

warp

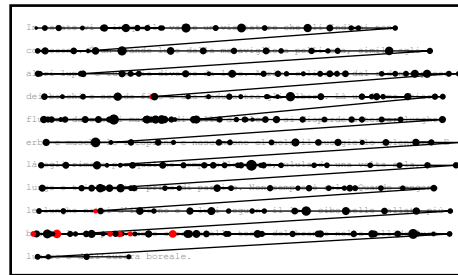

Participant 274, passage 2A (child)

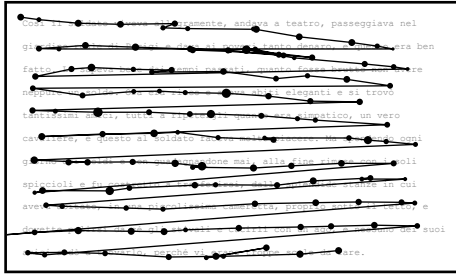

Gold standard manual correction

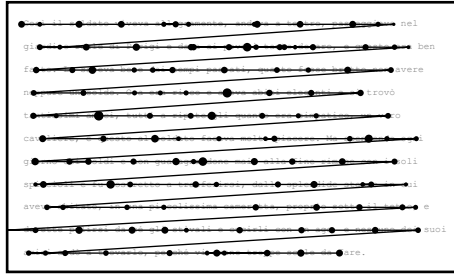

attach

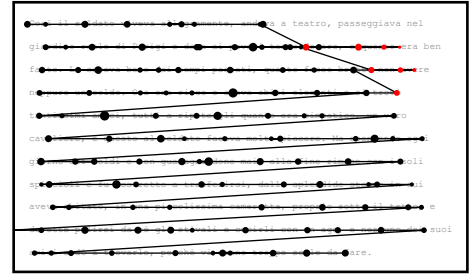

chain

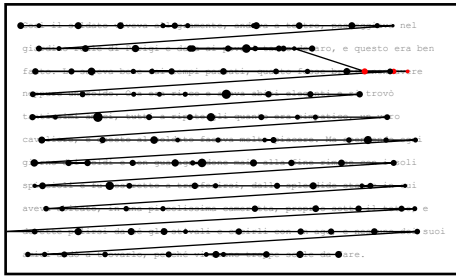

ccluster

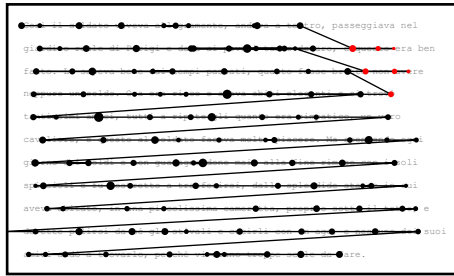

compare

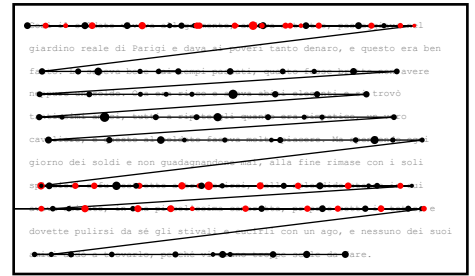

merge

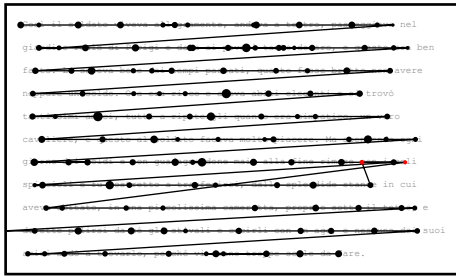

regress

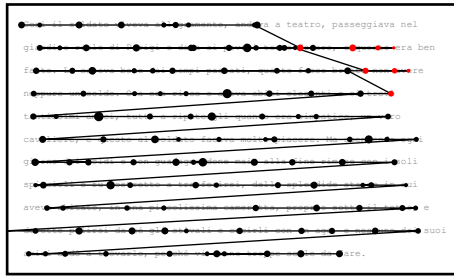

segment

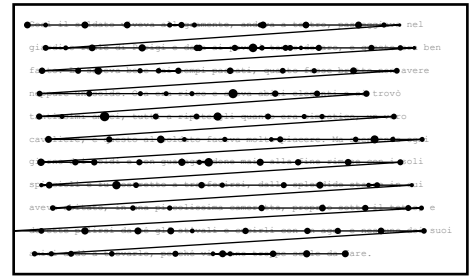

split

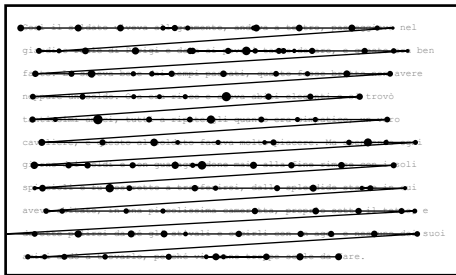

stretch

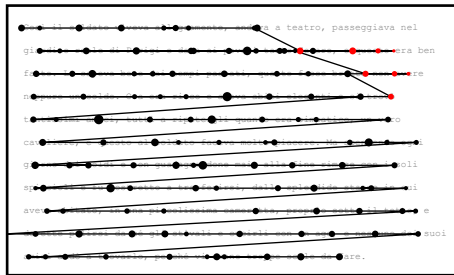

warp

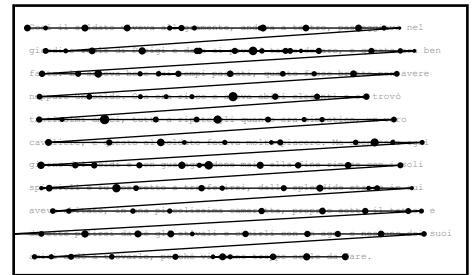

Participant 281, passage 2B (child)

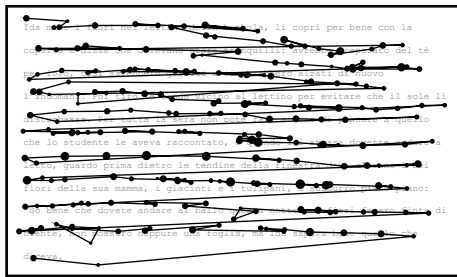

Gold standard manual correction

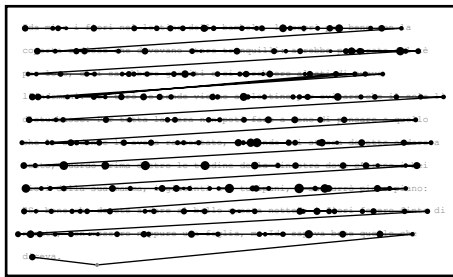

attach

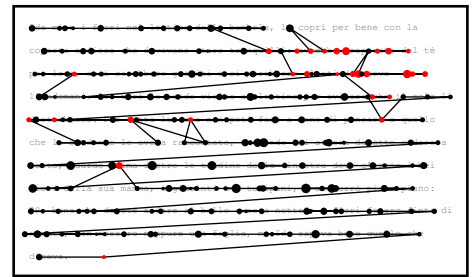

chain

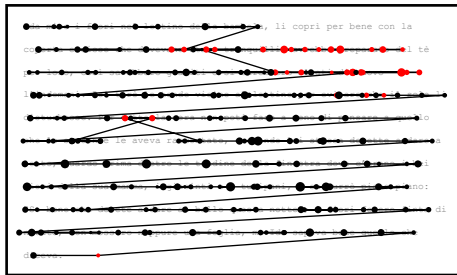

ccluster

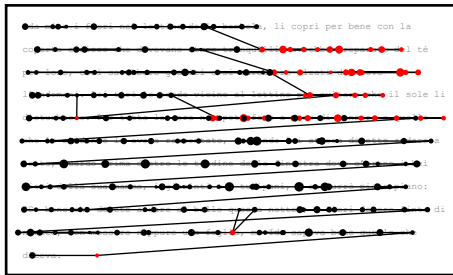

compare

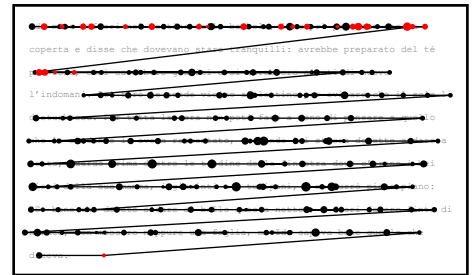

merge

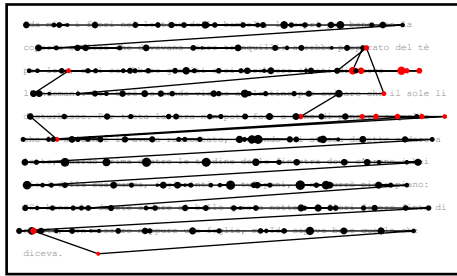

regress

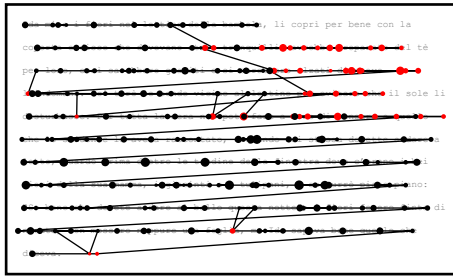

segment

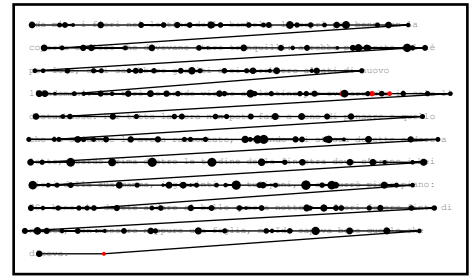

split

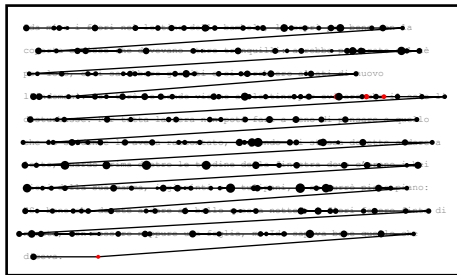

stretch

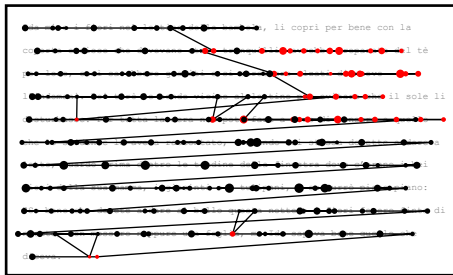

warp

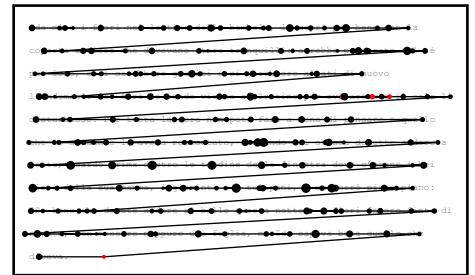



Participant 336, passage 2B (child)

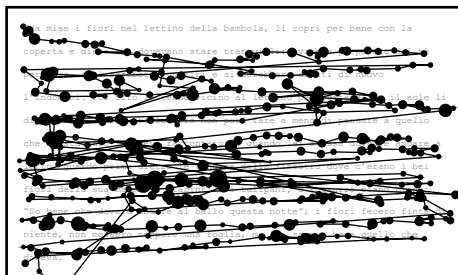

Gold standard manual correction

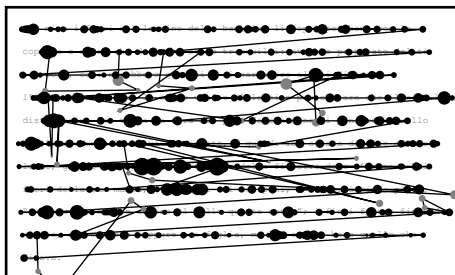

attach

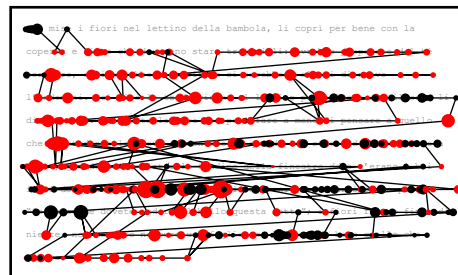

chain

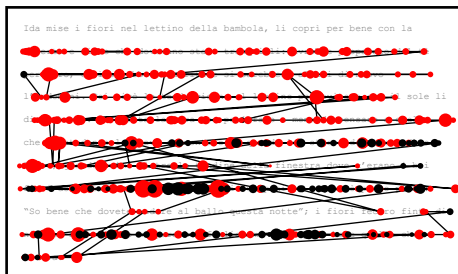

ccluster

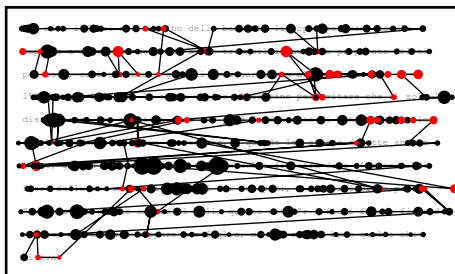

compare

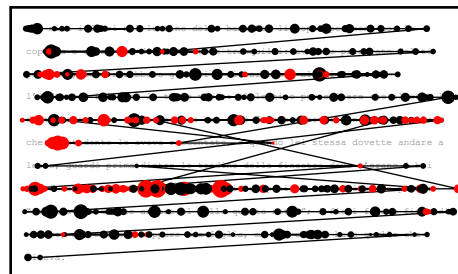

merge

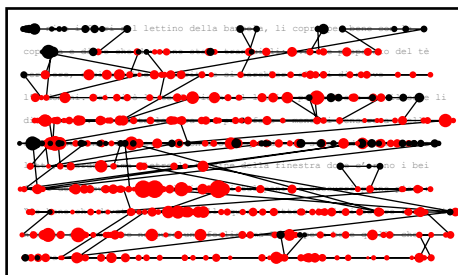

regress

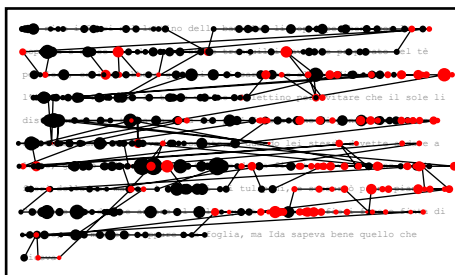

segment

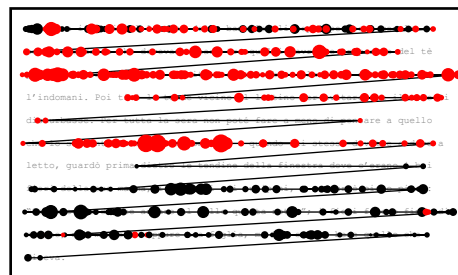

split

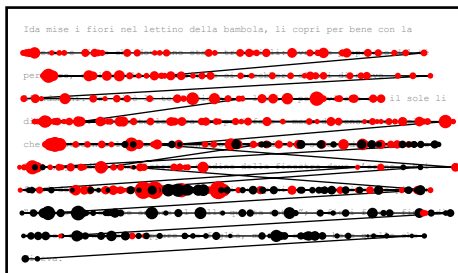

stretch

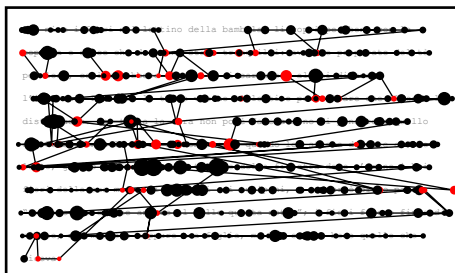

warp

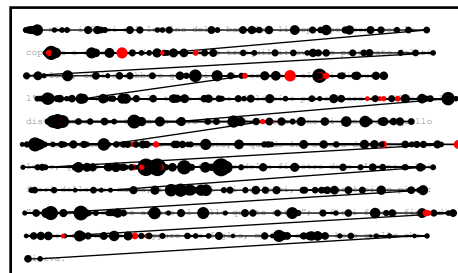

Participant 341, passage 4B (child)

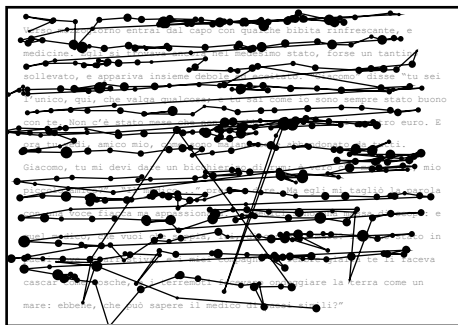

Gold standard manual correction

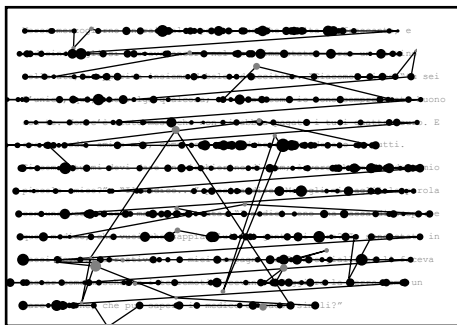

attach

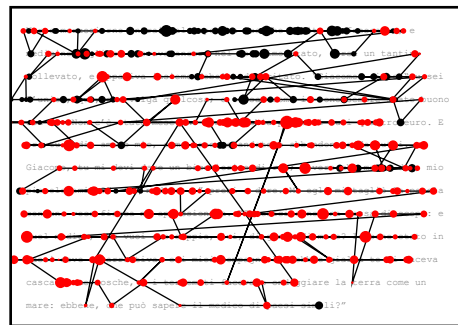

chain

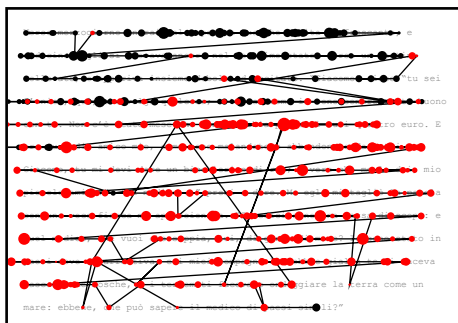

cluster

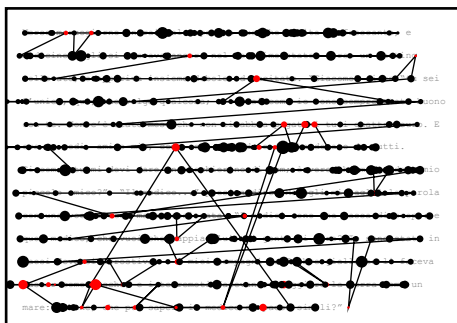

compare

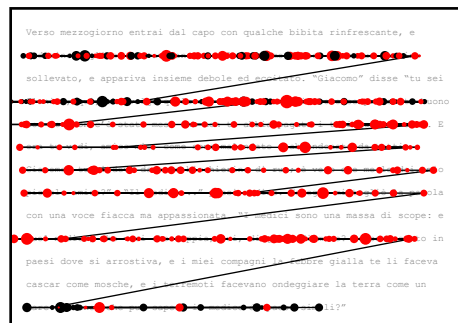

merge

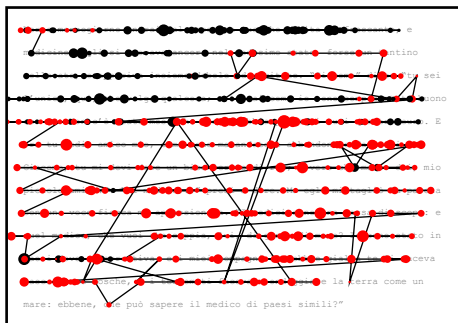

regress

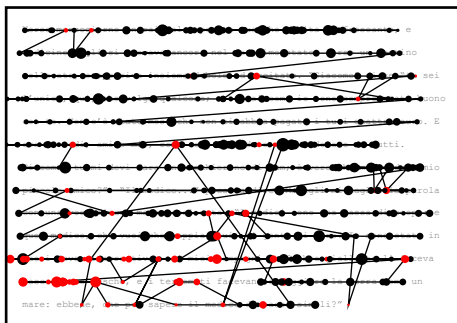

segment

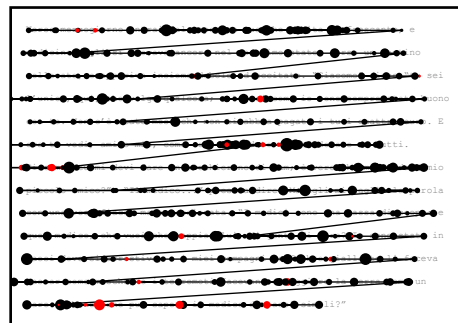

split

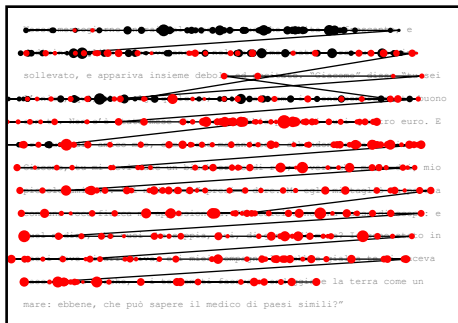

stretch

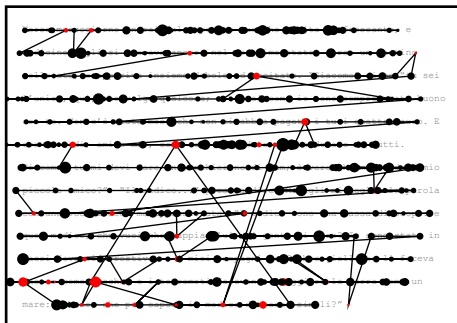

warp

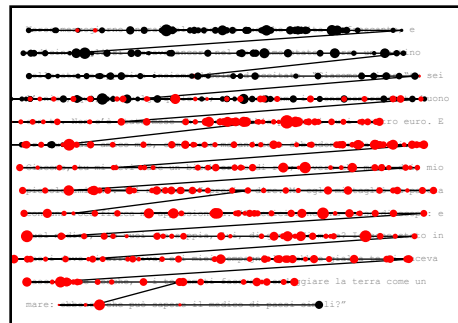

Participant 384, passage 1B (child)

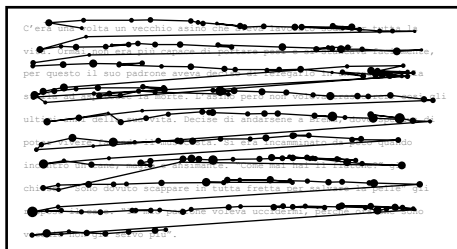

Gold standard manual correction

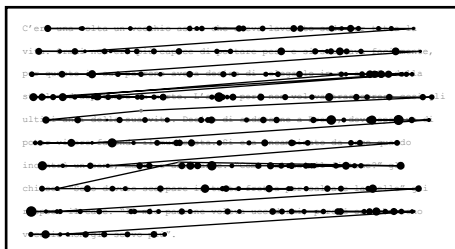

attach

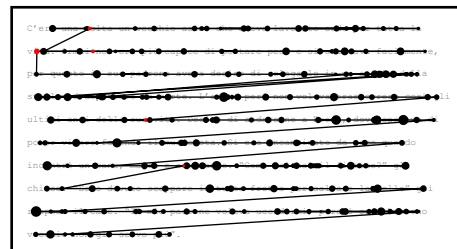

chain

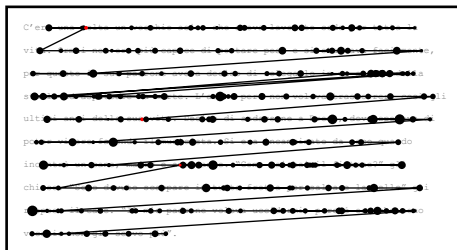

cluster

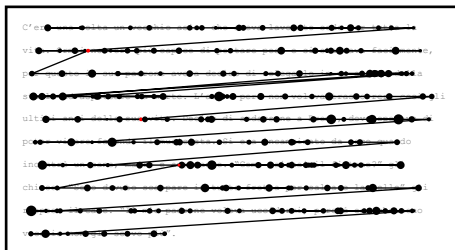

compare

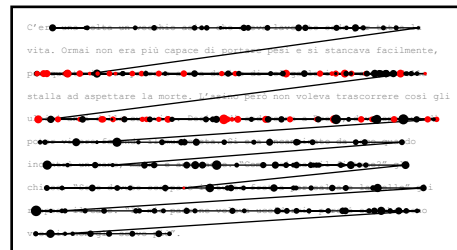

merge

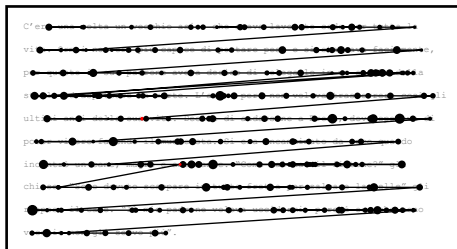

regress

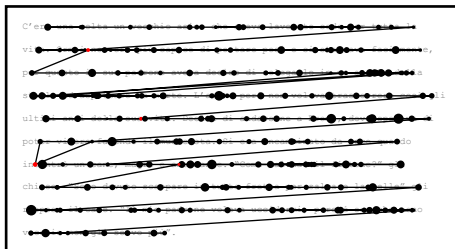

segment

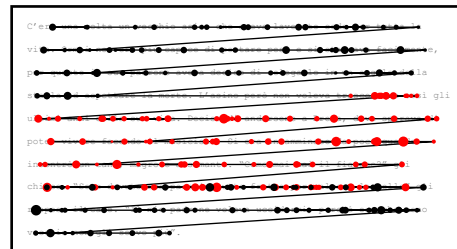

split

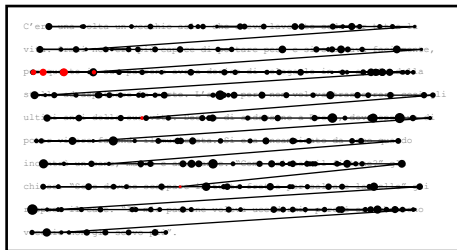

stretch

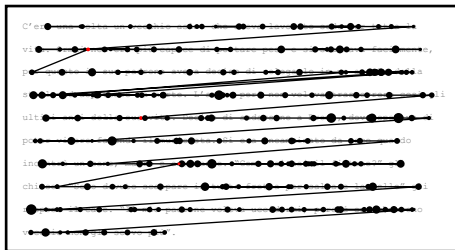

warp

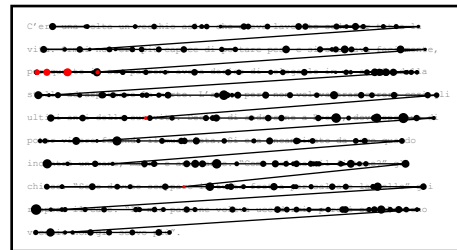

Participant 395, passage 6B (child)

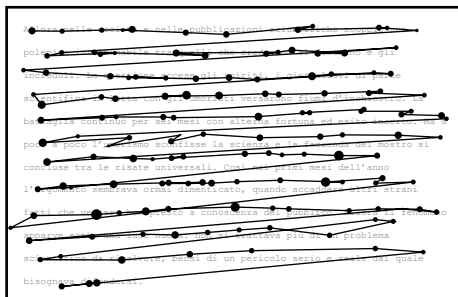

Gold standard manual correction

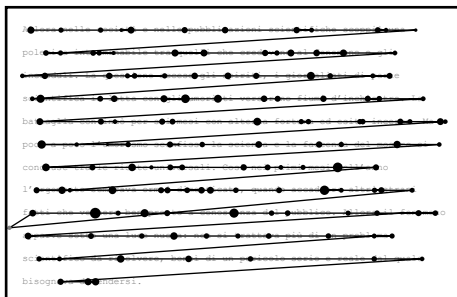

attach

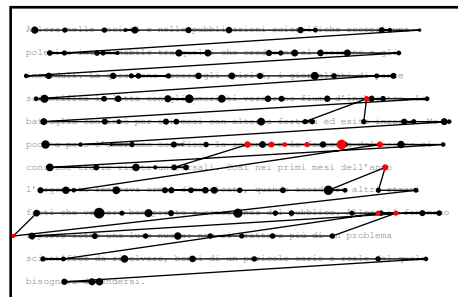

chain

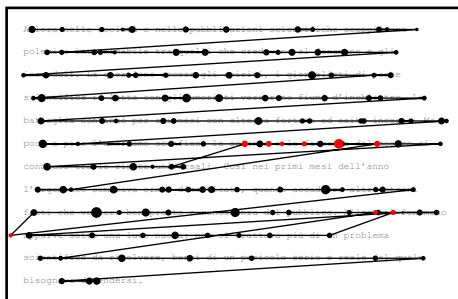

cluster

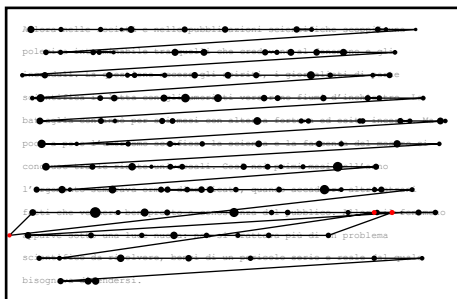

compare

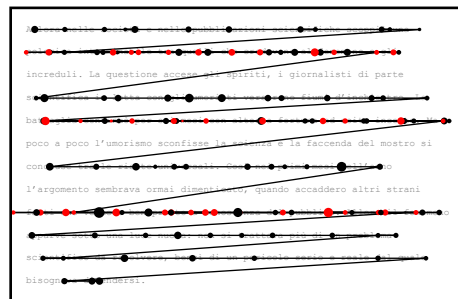

merge

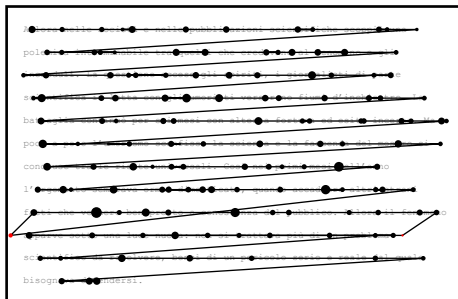

regress

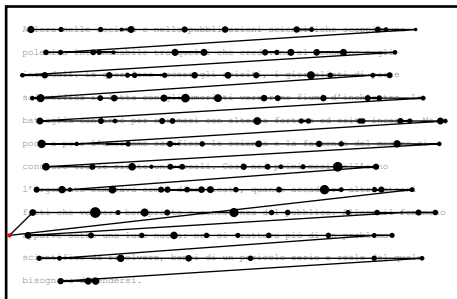

segment

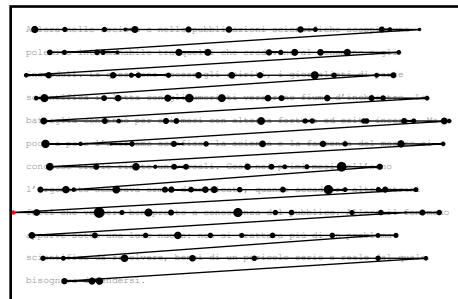

split

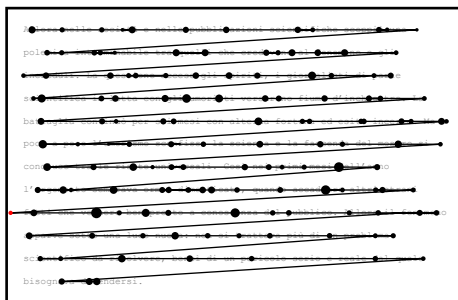

stretch

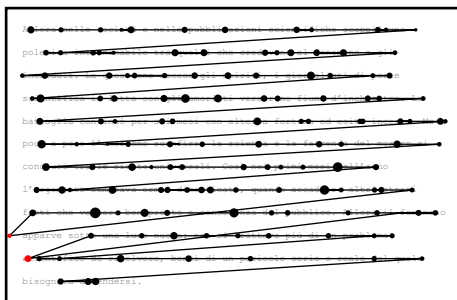

warp

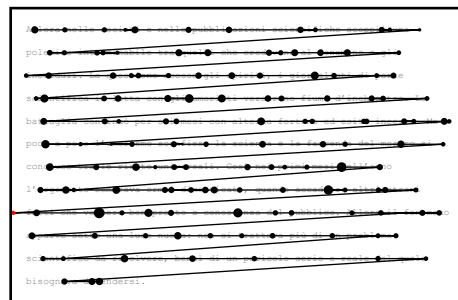

Participant 413, passage 4B (child)

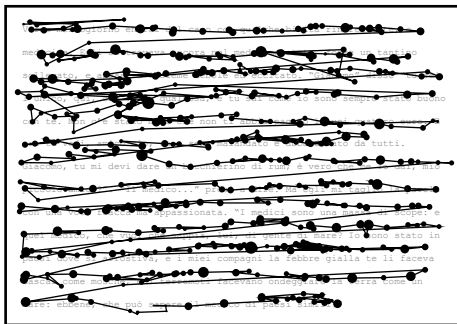

Gold standard manual correction

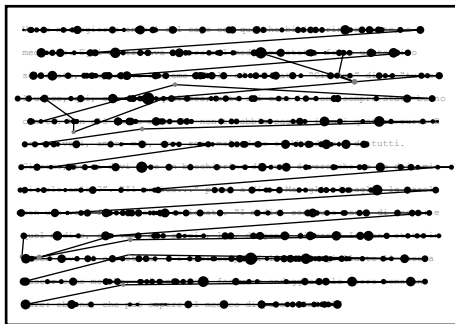

attach

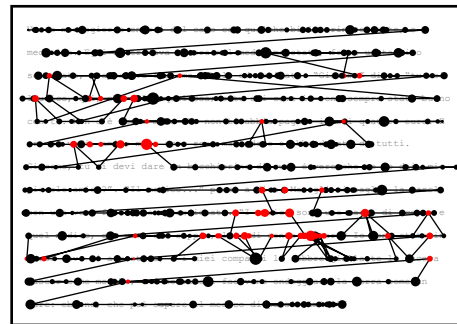

chain

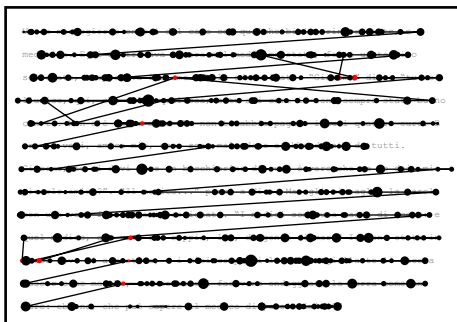

cluster

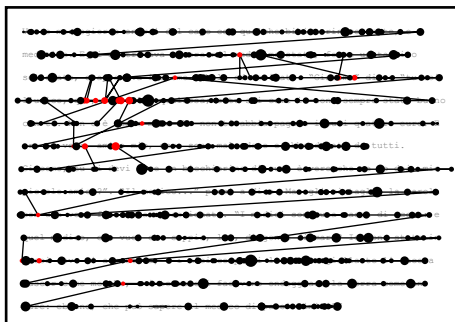

compare

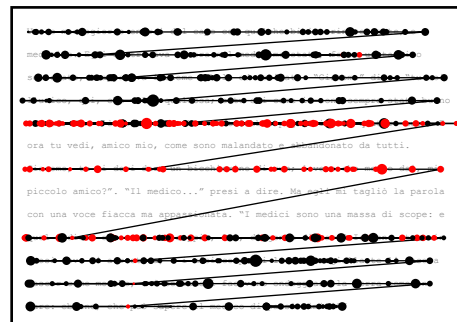

merge

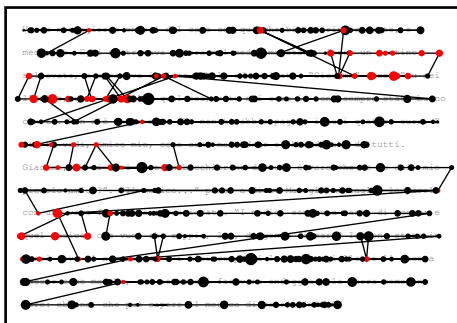

regress

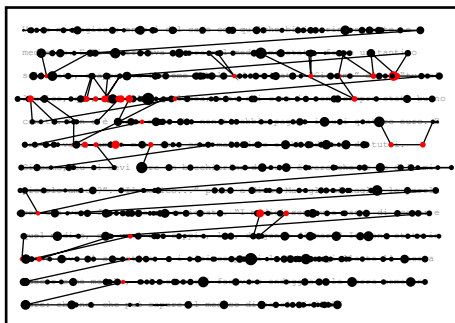

segment

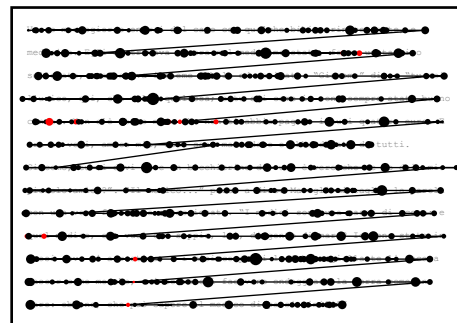

split

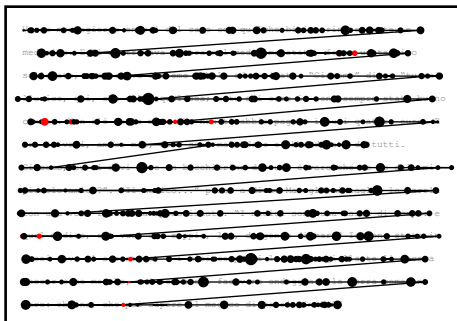

stretch

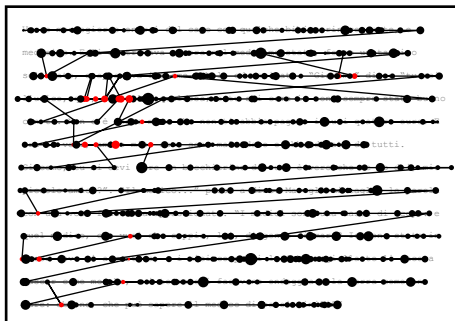

warp

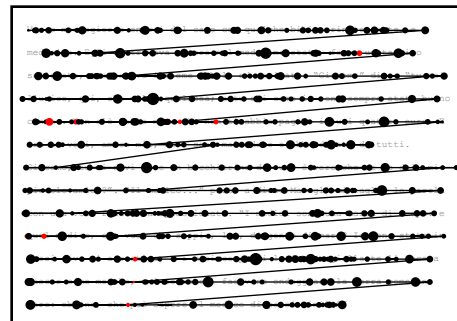

Participant 425, passage 3A (child)

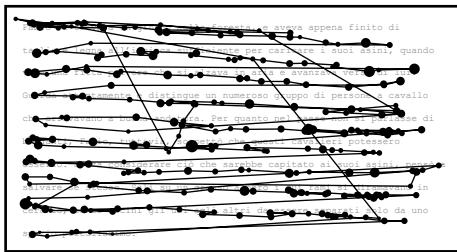

Gold standard manual correction

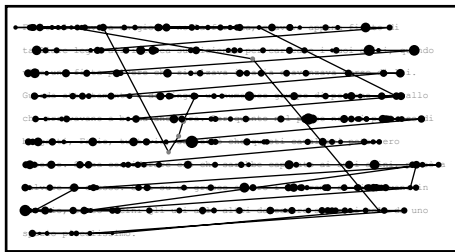

attach

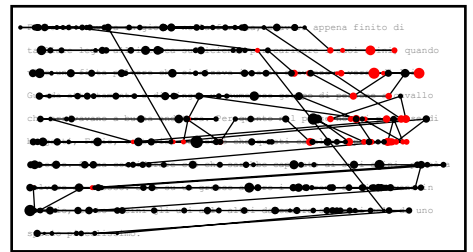

chain

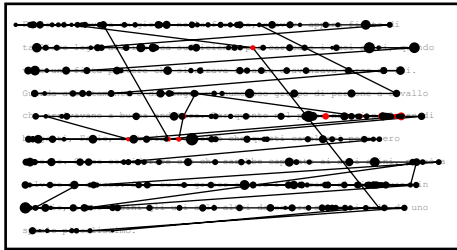

cluster

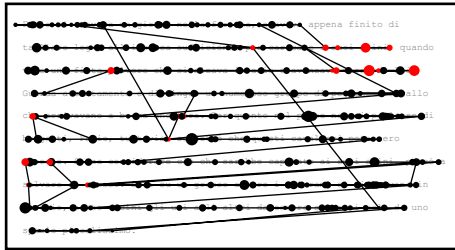

compare

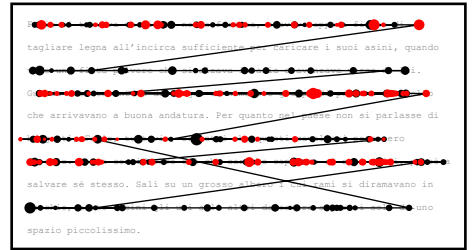

merge

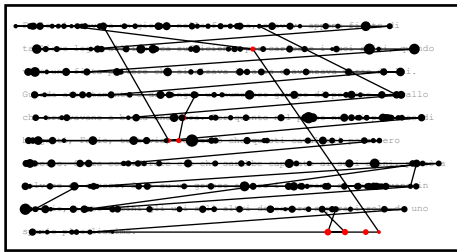

regress

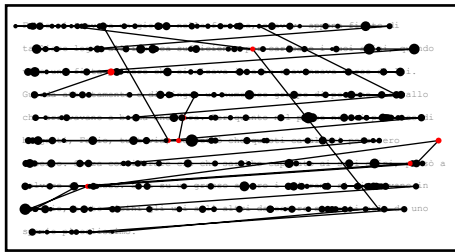

segment

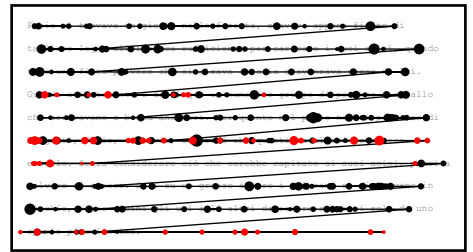

split

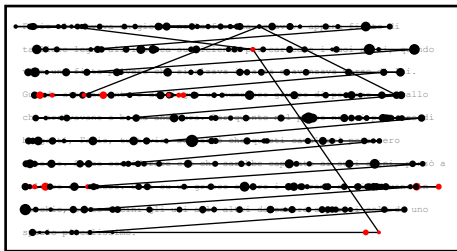

stretch

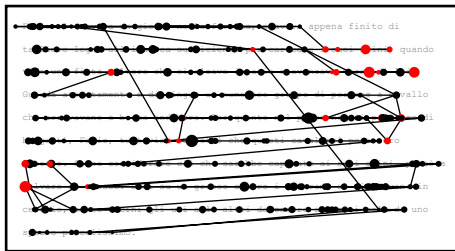

warp

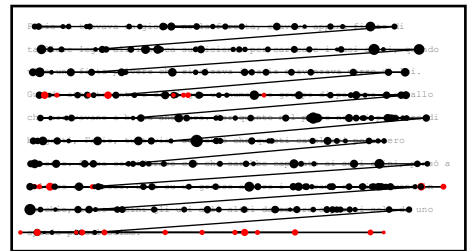

Participant 432, passage 3B (child)

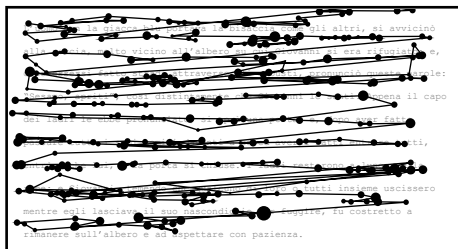

Gold standard manual correction

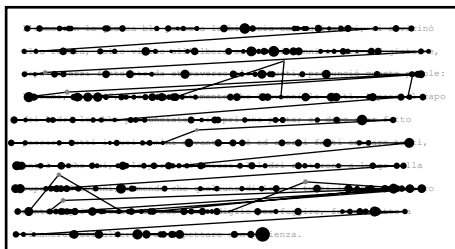

attach

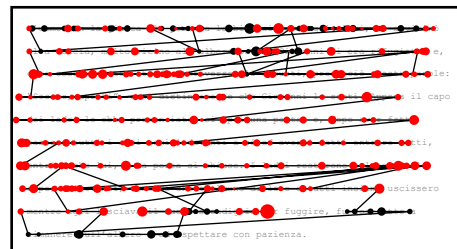

chain

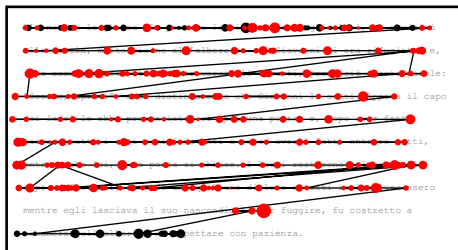

cluster

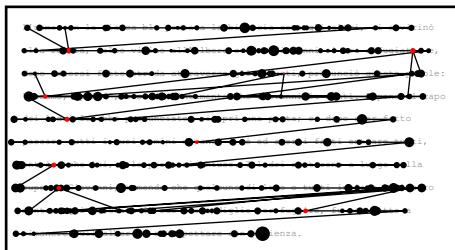

compare

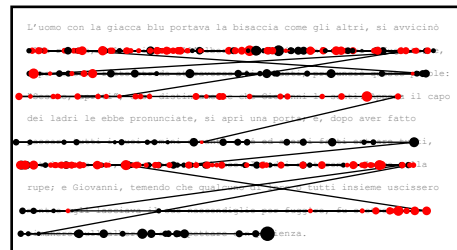

merge

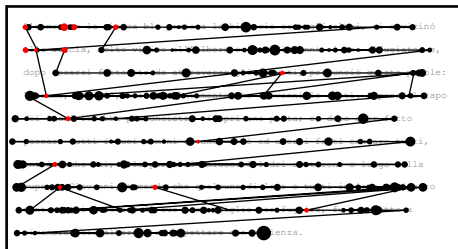

regress

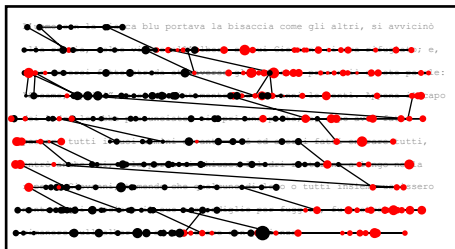

segment

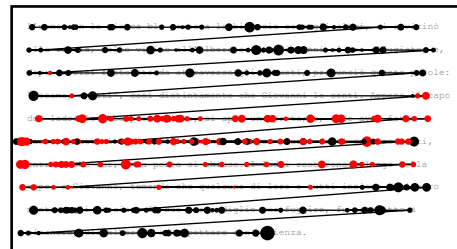

split

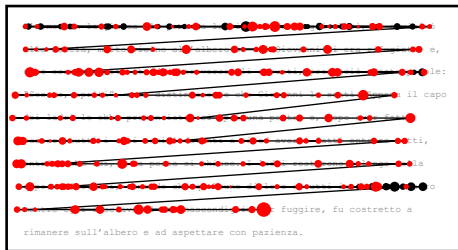

stretch

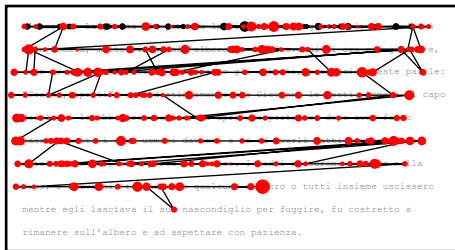

warp

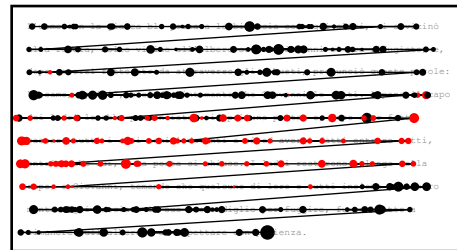

Participant 443, passage 4A (child)

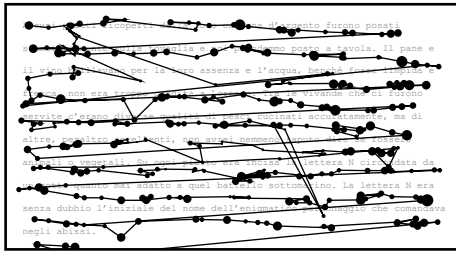

Gold standard manual correction

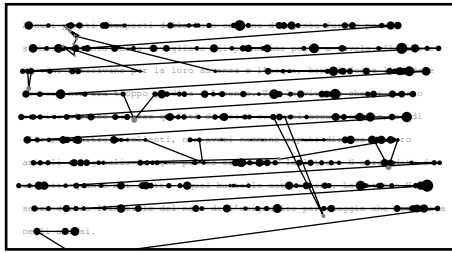

attach

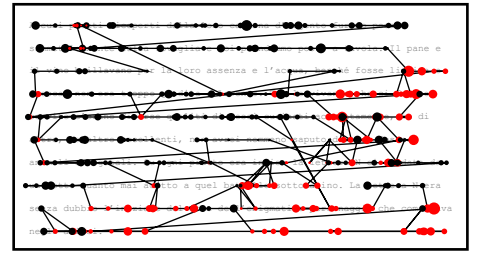

chain

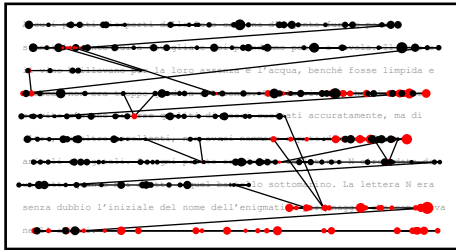

cluster

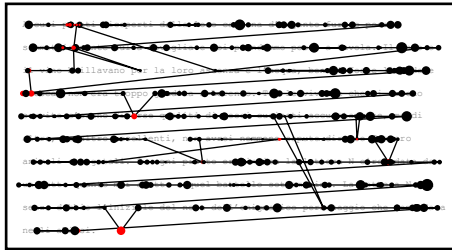

compare

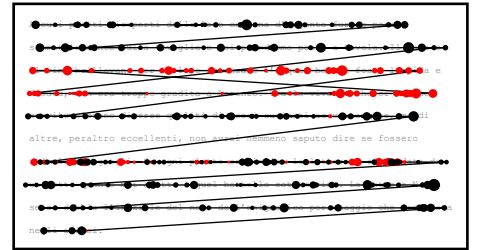

merge

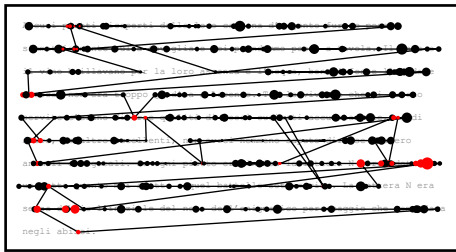

regress

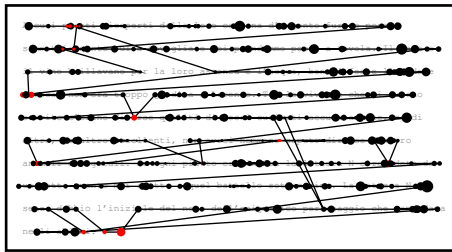

segment

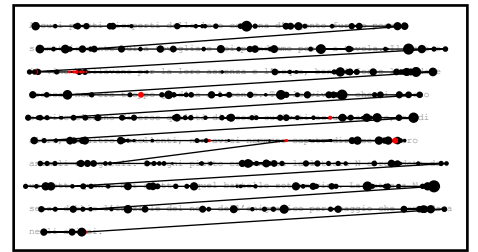

split

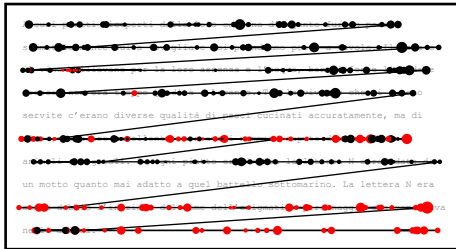

stretch

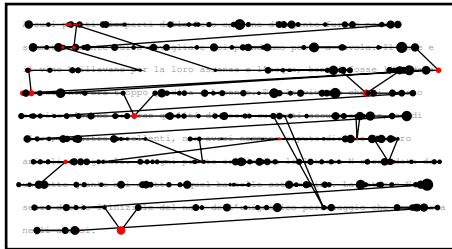

warp

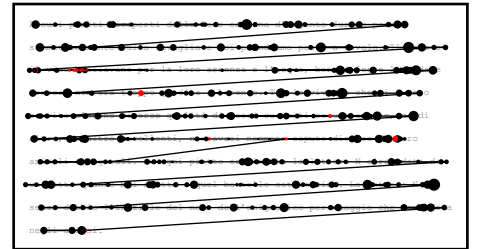

Supplement: 13428_2021_1554_MOESM2_ESM.pdf [file 13428_2021_1554_MOESM2_ESM.pdf]
